# Supplementary material for: Vascular endothelial-specific loss of TGF-beta signaling as a model for choroidal neovascularization and central nervous system vascular inflammation
Source: eLife. 2025 Dec 23;14:RP107018. doi: 10.7554/eLife.107018 (PMC12726833; doi:10.7554/eLife.107018)
Supplement: Supplementary file 1. [file elife-107018-supp1.xlsx]

## Sheet: ECs
gene	avg_log2FC	fraction of WT cells expressing	fraction of mutant cells expressing	p_val	p_val_adj
Mest	-6.06637	0.005	0.089	2.63627e-45	6.99349e-41
Ahr	-5.8137	0.008	0.106	1.06877e-51	2.83522e-47		This list of BECs DEG was filtered for genes with adjusted p-value < 0.05, log2 fold change > 1.2, expression in at least 5% of the Ecs in either WT or mutant Ecs
Ccdc88c	-5.05986	0.005	0.064	1.6848e-30	4.46944e-26
Lix1	-4.77099	0.003	0.066	1.22157e-34	3.24057e-30
Pcdh17	-4.63692	0.02	0.196	3.83375e-92	1.01702e-87
Sox12	-4.5737	0.008	0.058	5.97955e-23	1.58625e-18
Itga2	-4.46097	0.008	0.111	2.17322e-53	5.76511e-49
Ugcg	-4.31891	0.014	0.092	8.79749e-36	2.3338e-31
Nr5a2	-4.21189	0.006	0.181	9.84882e-100	2.61269e-95
Tox	-4.19425	0.011	0.151	2.92267e-75	7.75326e-71
Fam131a	-3.96539	0.005	0.051	4.01767e-23	1.06581e-18
Noc2l	-3.82622	0.009	0.06	9.1509e-24	2.42755e-19
Gsap	-3.77069	0.006	0.06	2.17045e-27	5.75778e-23
Map2k6	-3.76138	0.027	0.15	2.46184e-55	6.53078e-51
Ablim3	-3.72653	0.008	0.061	8.01259e-25	2.12558e-20
Nckap5	-3.71251	0.022	0.257	1.04532e-128	2.77302e-124
Pik3c2b	-3.70222	0.015	0.094	1.52711e-35	4.05112e-31
Rgs16	-3.67084	0.011	0.052	4.09838e-17	1.08722e-12
Dglucy	-3.51911	0.011	0.051	3.25758e-16	8.6417e-12
Slc22a23	-3.43541	0.019	0.129	3.97087e-52	1.05339e-47
Atp11a	-3.43216	0.032	0.152	3.62638e-52	9.62007e-48
Stk10	-3.40023	0.013	0.063	3.19014e-21	8.4628e-17
Tox3	-3.39928	0.059	0.314	1.50439e-127	3.99084e-123
Stard5	-3.37922	0.043	0.197	9.18264e-68	2.43597e-63
Pabpn1	-3.36788	0.012	0.059	4.57699e-20	1.21418e-15
Hdac3	-3.21345	0.017	0.095	1.57629e-34	4.18157e-30
Gpihbp1	-3.20867	0.008	0.066	1.21202e-27	3.21525e-23
Ogfrl1	-3.14575	0.01	0.051	6.44158e-18	1.70882e-13
Papss2	-3.1082	0.011	0.063	1.30953e-22	3.47392e-18
Noct	-3.10092	0.023	0.091	2.68652e-26	7.1268e-22
Mmrn1	-3.08427	0.012	0.095	3.83793e-39	1.01813e-34
Bzw2	-3.0248	0.027	0.125	1.17925e-41	3.12831e-37
Tmem131l	-2.99331	0.015	0.068	6.61337e-22	1.75439e-17
Snx10	-2.97703	0.02	0.092	1.70816e-29	4.53142e-25
Atxn2l	-2.96924	0.025	0.116	1.46932e-38	3.89782e-34
Ppp1r9a	-2.92673	0.018	0.121	1.12711e-47	2.99e-43
Pnpt1	-2.90166	0.017	0.074	6.50863e-23	1.72661e-18
Ankrd16	-2.88865	0.018	0.055	3.88046e-13	1.02941e-08
Sirpa	-2.88189	0.027	0.106	7.57251e-31	2.00884e-26
Sfi1	-2.85899	0.019	0.074	7.62924e-22	2.02389e-17
Myo9b	-2.84175	0.023	0.077	8.48351e-20	2.2505e-15
Cd109	-2.83979	0.027	0.122	5.04159e-39	1.33743e-34
Adam19	-2.81839	0.039	0.139	1.85075e-37	4.90968e-33
Ntng2	-2.79533	0.013	0.057	3.10379e-18	8.23372e-14
Zwint	-2.79017	0.025	0.083	3.42458e-21	9.08473e-17
Enpp2	-2.7352	0.115	0.585	1.10543e-297	2.93249e-293
Gramd1a	-2.73118	0.021	0.067	1.81626e-16	4.81818e-12
Rnf24	-2.72326	0.012	0.051	4.98437e-16	1.32225e-11
Pitrm1	-2.71337	0.015	0.054	1.24552e-14	3.30411e-10
Dis3	-2.70578	0.019	0.061	5.76336e-15	1.5289e-10
Tmem47	-2.69355	0.015	0.084	1.85102e-30	4.91039e-26
Pknox2	-2.69222	0.021	0.07	1.8607e-17	4.93607e-13
Snhg9	-2.65614	0.018	0.076	3.85673e-23	1.02311e-18
Senp3	-2.65221	0.021	0.066	6.20876e-16	1.64706e-11
Srsf7	-2.63535	0.069	0.228	4.09068e-64	1.08518e-59
Cep128	-2.62299	0.022	0.067	4.42158e-15	1.17296e-10
Ipo5	-2.62194	0.04	0.112	1.4139e-23	3.7508e-19
Taf1d	-2.61985	0.065	0.213	1.72205e-57	4.56826e-53
Tia1	-2.61378	0.058	0.212	1.59794e-62	4.23902e-58
Gpc4	-2.59373	0.017	0.078	7.68037e-25	2.03745e-20
Ank	-2.58518	0.026	0.115	8.02686e-37	2.12937e-32
Rabl6	-2.57855	0.034	0.116	6.39385e-31	1.69616e-26
Rpa1	-2.56423	0.034	0.104	3.59818e-24	9.54525e-20
Sgce	-2.54722	0.05	0.172	5.76151e-47	1.52841e-42
6430548M08Rik	-2.54521	0.015	0.051	3.96578e-13	1.05204e-08
Zfp512b	-2.53656	0.017	0.062	5.59322e-17	1.48377e-12
Abhd17b	-2.53576	0.058	0.171	3.2811e-40	8.7041e-36
Ltbp1	-2.51947	0.01	0.06	2.95717e-22	7.84479e-18
Dnajc11	-2.51752	0.019	0.051	1.38751e-10	3.68079e-06
Polb	-2.50877	0.016	0.057	2.40481e-15	6.37947e-11
Zfp821	-2.48198	0.016	0.052	5.10977e-13	1.35552e-08
Rnf144a	-2.47806	0.06	0.165	1.52725e-35	4.0515e-31
Rangap1	-2.46177	0.026	0.065	5.89735e-12	1.56445e-07
Gclc	-2.461	0.019	0.051	1.71745e-10	4.55605e-06
Ehmt2	-2.45782	0.025	0.079	6.81729e-19	1.80849e-14
Cep95	-2.44708	0.019	0.053	3.61822e-11	9.59842e-07
Ildr2	-2.43273	0.26	0.703	1.02199e-295	2.71114e-291
Ncapd2	-2.4186	0.036	0.106	1.27782e-23	3.38981e-19
Rps6ka5	-2.39363	0.052	0.172	3.23234e-45	8.57475e-41
Mex3a	-2.39241	0.022	0.082	2.71e-22	7.18907e-18
Gli3	-2.39073	0.035	0.137	5.75248e-40	1.52602e-35
Rabggtb	-2.38103	0.03	0.069	3.65894e-11	9.70645e-07
Ap1b1	-2.3802	0.025	0.083	1.06566e-20	2.827e-16
Rfc2	-2.37404	0.021	0.059	1.86331e-12	4.94299e-08
Arfip2	-2.36733	0.023	0.055	7.47682e-10	1.98345e-05
Adamts5	-2.36721	0.027	0.061	8.21983e-10	2.18056e-05
Gm47283	-2.35465	0.032	0.107	4.77435e-27	1.26654e-22
Cttnbp2	-2.34071	0.035	0.159	6.85516e-52	1.81854e-47
Trf	-2.336	0.065	0.192	9.13419e-45	2.42312e-40
Clstn1	-2.32582	0.04	0.113	1.07453e-24	2.85052e-20
Marcksl1	-2.31416	0.062	0.218	4.01637e-61	1.06546e-56
Mtx2	-2.30454	0.04	0.101	4.16504e-19	1.1049e-14
Oxct1	-2.30139	0.028	0.094	1.36684e-23	3.62595e-19
Nceh1	-2.30007	0.029	0.072	1.55773e-13	4.13235e-09
Gas5	-2.2976	0.068	0.221	1.30937e-59	3.4735e-55
Npdc1	-2.29402	0.041	0.136	2.16633e-34	5.74683e-30
Atp6v1b2	-2.2925	0.028	0.072	1.38466e-13	3.67323e-09
Jpt1	-2.29233	0.038	0.115	6.37162e-26	1.69026e-21
Hlf	-2.28949	0.055	0.145	1.93283e-29	5.12741e-25
Tgfbr3	-2.28328	0.184	0.47	6.54273e-131	1.73565e-126
Chuk	-2.27607	0.028	0.08	2.83505e-17	7.52082e-13
Tada2a	-2.26773	0.045	0.121	5.61626e-25	1.48988e-20
Med25	-2.26229	0.03	0.074	4.4479e-13	1.17994e-08
Dnaaf9	-2.25824	0.032	0.112	1.06604e-29	2.82799e-25
Aagab	-2.25759	0.019	0.059	6.93007e-14	1.83841e-09
Snx11	-2.25558	0.025	0.056	3.90207e-09	0.000103514
Dut	-2.25451	0.026	0.058	4.03808e-09	0.000107122
Ciz1	-2.2485	0.032	0.077	6.82045e-14	1.80933e-09
Gnl3	-2.24698	0.029	0.076	2.48343e-14	6.58804e-10
Arhgef26	-2.24357	0.012	0.055	1.05189e-17	2.79046e-13
Anxa6	-2.24191	0.098	0.232	2.85113e-44	7.56348e-40
Lrif1	-2.24169	0.026	0.075	1.48455e-16	3.93822e-12
Ldb2	-2.2411	0.038	0.207	1.2829e-77	3.40329e-73
Kmt2b	-2.23827	0.034	0.091	2.69819e-18	7.15776e-14
Mtmr11	-2.23626	0.019	0.053	5.08487e-11	1.34891e-06
Cadm1	-2.23272	0.163	0.435	2.21235e-121	5.86892e-117
Tmem181a	-2.22203	0.017	0.052	4.98258e-12	1.32178e-07
Me2	-2.22159	0.011	0.052	1.06137e-16	2.81561e-12
Slf1	-2.21125	0.031	0.083	6.76694e-17	1.79513e-12
Ccar2	-2.21063	0.034	0.084	6.6777e-15	1.77146e-10
Limd2	-2.20751	0.021	0.053	1.00337e-09	2.66174e-05
Carnmt1	-2.2019	0.044	0.118	1.46201e-23	3.87843e-19
Utp20	-2.20068	0.023	0.053	4.25946e-09	0.000112995
Wdfy1	-2.19666	0.053	0.113	1.45029e-16	3.84733e-12
Rmc1	-2.17601	0.028	0.066	7.31685e-11	1.94101e-06
Dgcr8	-2.17062	0.04	0.096	3.68607e-17	9.7784e-13
Sacs	-2.16256	0.03	0.093	1.0386e-21	2.75519e-17
Armcx1	-2.15893	0.028	0.078	5.87244e-16	1.55784e-11
Paxip1	-2.15445	0.025	0.061	5.88447e-11	1.56103e-06
Alkbh1	-2.14121	0.026	0.061	2.94033e-10	7.80011e-06
Srsf10	-2.13116	0.07	0.156	3.04161e-25	8.06878e-21
Clns1a	-2.12109	0.034	0.074	6.58717e-11	1.74745e-06
Sart3	-2.11951	0.029	0.065	2.46942e-10	6.55087e-06
Ptov1	-2.11717	0.052	0.111	4.97753e-16	1.32044e-11
Dgkz	-2.11643	0.066	0.161	4.67597e-30	1.24044e-25
Ing4	-2.10476	0.042	0.08	3.31499e-09	8.79401e-05
Larp1b	-2.10402	0.044	0.123	2.27308e-26	6.03004e-22
Hip1r	-2.0994	0.039	0.089	2.64141e-14	7.00712e-10
Tm7sf3	-2.09551	0.041	0.087	1.30975e-12	3.47451e-08
Dhx33	-2.0938	0.021	0.052	4.21827e-09	0.000111902
Fbln1	-2.07543	0.029	0.077	8.15851e-15	2.16429e-10
Prpsap2	-2.07277	0.043	0.094	4.43647e-14	1.17691e-09
Dot1l	-2.06716	0.08	0.199	1.89754e-39	5.0338e-35
Ccdc77	-2.06671	0.032	0.067	1.15458e-09	3.06287e-05
Fbxo28	-2.05804	0.047	0.103	2.18136e-15	5.78672e-11
Car14	-2.05581	0.038	0.096	6.47819e-18	1.71853e-13
Ralgds	-2.0553	0.038	0.091	2.81262e-15	7.46133e-11
Lig1	-2.05215	0.038	0.09	9.83186e-15	2.6082e-10
Srsf6	-2.05098	0.095	0.218	1.27822e-39	3.39087e-35
Psip1	-2.05082	0.029	0.085	3.70899e-18	9.8392e-14
Tusc3	-2.04808	0.038	0.102	5.45275e-20	1.4465e-15
Abhd18	-2.04614	0.021	0.057	2.56813e-11	6.81275e-07
Mdn1	-2.03772	0.022	0.052	9.20798e-09	0.000244269
Dgke	-2.03366	0.055	0.129	2.47374e-21	6.56233e-17
Sdad1	-2.02986	0.025	0.067	2.48951e-13	6.60418e-09
Zswim8	-2.02513	0.067	0.137	2.04437e-19	5.42331e-15
2700049A03Rik	-2.01318	0.042	0.087	1.22155e-11	3.24052e-07
Setdb1	-2.01173	0.025	0.062	1.77734e-11	4.71492e-07
Fancl	-2.00796	0.03	0.065	6.84271e-10	1.81523e-05
Cstf2	-2.00237	0.021	0.053	4.50501e-10	1.19509e-05
Agmo	-1.98864	0.052	0.154	3.39062e-35	8.99464e-31
Ccnh	-1.98348	0.023	0.058	1.31734e-10	3.49463e-06
Tec	-1.98298	0.158	0.397	2.14152e-93	5.68101e-89
Usp46	-1.98227	0.134	0.266	1.35101e-39	3.58397e-35
Tafazzin	-1.97967	0.023	0.06	2.35022e-11	6.23468e-07
Eef1akmt2	-1.97879	0.029	0.072	2.42923e-13	6.44425e-09
Nop58	-1.97782	0.051	0.101	1.58063e-12	4.19309e-08
Zfp251	-1.97693	0.024	0.052	6.81752e-08	0.00180855
Trp53bp1	-1.97341	0.027	0.063	1.8725e-10	4.96737e-06
Cd9	-1.97242	0.041	0.118	2.04104e-25	5.41448e-21
Gfod1	-1.96782	0.124	0.371	4.88095e-103	1.29482e-98
Gart	-1.96565	0.026	0.057	1.01642e-08	0.000269637
Mbd6	-1.95338	0.026	0.058	2.27154e-09	6.02595e-05
Nsd2	-1.95153	0.099	0.217	1.43213e-35	3.79915e-31
Lpgat1	-1.95058	0.027	0.086	6.81235e-21	1.80718e-16
Snhg1	-1.94516	0.039	0.087	3.76007e-13	9.97472e-09
Metap1d	-1.94494	0.024	0.062	1.00122e-11	2.65604e-07
Gm12940	-1.94381	0.082	0.217	6.84623e-47	1.81617e-42
Zbtb21	-1.94109	0.027	0.061	1.48339e-09	3.93514e-05
Kdm5d	-1.93709	0.025	0.089	3.66677e-23	9.72722e-19
Klhl3	-1.93706	0.02	0.068	2.30848e-17	6.12393e-13
Ilf3	-1.93674	0.064	0.141	6.47254e-22	1.71704e-17
Nup85	-1.93311	0.036	0.071	5.84786e-09	0.000155132
Camsap1	-1.93306	0.038	0.091	4.88164e-16	1.295e-11
Xndc1	-1.93264	0.023	0.052	4.35083e-08	0.00115419
Ubqln4	-1.9318	0.028	0.069	2.17697e-12	5.77506e-08
Rcbtb2	-1.92495	0.029	0.059	6.07766e-08	0.00161228
Afg3l2	-1.92458	0.027	0.062	8.40806e-10	2.23049e-05
Nup54	-1.92351	0.039	0.086	1.14155e-12	3.02829e-08
Tmem19	-1.92301	0.023	0.056	3.32561e-10	8.82217e-06
Snrnp70	-1.92217	0.095	0.228	2.60472e-43	6.90981e-39
Srrt	-1.91802	0.071	0.158	2.3499e-25	6.23383e-21
Rnf121	-1.91659	0.028	0.064	3.46928e-10	9.2033e-06
B3galnt2	-1.91315	0.026	0.06	6.7888e-10	1.80093e-05
Fbxw17	-1.91297	0.05	0.096	4.6964e-11	1.24586e-06
Odc1	-1.91008	0.102	0.247	3.38184e-47	8.97134e-43
Stub1	-1.91005	0.04	0.082	3.24629e-11	8.61175e-07
Mat2a	-1.908	0.118	0.263	6.13889e-48	1.62852e-43
Slc23a2	-1.9059	0.051	0.117	4.70783e-19	1.24889e-14
Tpgs2	-1.90547	0.032	0.072	2.45145e-11	6.50319e-07
Rae1	-1.89564	0.034	0.072	3.44754e-10	9.14564e-06
Cep152	-1.89467	0.023	0.051	3.60409e-08	0.000956092
Slc26a10	-1.89374	0.013	0.058	9.40467e-18	2.49487e-13
Clk3	-1.89309	0.032	0.07	2.27836e-10	6.04404e-06
Tent4a	-1.89037	0.035	0.075	6.33644e-11	1.68093e-06
AI480526	-1.88997	0.034	0.081	7.18063e-14	1.90488e-09
Mettl25	-1.88683	0.023	0.053	2.00627e-08	0.000532222
Cmtm4	-1.88538	0.029	0.062	6.94375e-09	0.000184204
Dynlt2a2	-1.88249	0.024	0.053	3.03025e-08	0.000803864
Pde4d	-1.87917	0.375	0.77	3.57761e-274	9.49069e-270
Pom121	-1.87566	0.043	0.081	6.7871e-09	0.000180048
Trap1	-1.86891	0.036	0.069	2.15131e-08	0.000570699
Dtymk	-1.86738	0.049	0.102	5.2867e-14	1.40246e-09
Vstm2b	-1.86678	0.057	0.142	7.10504e-26	1.88483e-21
Fbl	-1.86452	0.056	0.108	6.74277e-13	1.78872e-08
Cit	-1.86224	0.011	0.058	1.28574e-20	3.41082e-16
Nol10	-1.85802	0.036	0.069	5.16455e-08	0.00137005
Utp4	-1.85147	0.038	0.071	4.93968e-08	0.0013104
Heatr1	-1.84699	0.025	0.054	5.39981e-08	0.00143246
Skiv2l	-1.83988	0.026	0.059	2.67545e-09	7.09744e-05
Hells	-1.83959	0.066	0.186	8.23032e-40	2.18334e-35
Rbck1	-1.83776	0.063	0.101	6.72255e-08	0.00178336
Pxdn	-1.8367	0.103	0.249	2.99634e-47	7.9487e-43
Stard7	-1.83033	0.028	0.06	7.33201e-09	0.000194504
Mrpl21	-1.82844	0.032	0.068	6.54585e-10	1.73648e-05
Prim2	-1.82734	0.034	0.069	2.09788e-09	5.56526e-05
Vav3	-1.82686	0.058	0.156	1.51733e-31	4.02518e-27
Pgk1	-1.82483	0.046	0.09	8.04247e-11	2.13351e-06
Kdm6b	-1.82334	0.101	0.206	1.2046e-28	3.19556e-24
Pde7a	-1.82214	0.028	0.063	4.34503e-10	1.15265e-05
Ddx39b	-1.81994	0.127	0.272	1.85487e-46	4.92061e-42
Tdrd7	-1.81626	0.098	0.191	3.90047e-24	1.03472e-19
Hspa9	-1.81332	0.104	0.207	2.29341e-28	6.08397e-24
Reps1	-1.81329	0.019	0.056	2.22057e-12	5.89072e-08
Sgpl1	-1.81121	0.04	0.082	8.49861e-11	2.25451e-06
Gigyf1	-1.80902	0.054	0.127	2.64162e-21	7.00768e-17
Yeats2	-1.80657	0.058	0.143	1.04251e-25	2.76557e-21
Rnf126	-1.80233	0.042	0.077	2.30734e-08	0.000612092
Ip6k2	-1.80083	0.036	0.075	1.13503e-10	3.01099e-06
Ammecr1	-1.79482	0.111	0.23	2.23053e-34	5.91715e-30
Spg21	-1.79357	0.026	0.054	1.28849e-07	0.00341811
Eri1	-1.79294	0.037	0.073	8.10025e-09	0.000214884
Tank	-1.79292	0.039	0.08	1.02895e-10	2.7296e-06
Usp54	-1.79273	0.097	0.185	5.68081e-23	1.507e-18
Peak1	-1.79077	0.219	0.444	6.59124e-86	1.74852e-81
Prmt2	-1.78987	0.027	0.066	1.83295e-11	4.86246e-07
Idh2	-1.78872	0.025	0.076	6.82156e-17	1.80962e-12
Trim35	-1.78797	0.098	0.208	7.01865e-32	1.86191e-27
Sh3bp5l	-1.78659	0.037	0.068	1.92473e-07	0.00510592
Wdr6	-1.77948	0.027	0.059	5.79042e-09	0.000153608
Piezo2	-1.77736	0.074	0.249	2.44854e-67	6.49548e-63
Hat1	-1.77625	0.035	0.08	8.03192e-13	2.13071e-08
Mdc1	-1.77587	0.027	0.053	1.62315e-06	0.043059
2410006H16Rik	-1.77495	0.043	0.075	1.49299e-07	0.00396059
Poglut2	-1.77324	0.044	0.079	2.86654e-08	0.000760436
Fh1	-1.77298	0.039	0.076	5.43568e-09	0.000144198
Tecpr2	-1.77291	0.033	0.073	3.59558e-11	9.53834e-07
Supt3	-1.77121	0.031	0.078	1.29028e-14	3.42287e-10
Hnrnph1	-1.76862	0.183	0.376	2.09618e-68	5.56076e-64
Washc5	-1.76754	0.036	0.071	4.53367e-09	0.000120269
Ruvbl1	-1.76685	0.044	0.079	3.67966e-08	0.00097614
Larp1	-1.76651	0.098	0.186	2.46012e-23	6.52621e-19
Ilf2	-1.7664	0.063	0.119	1.03996e-13	2.75879e-09
Cdin1	-1.7618	0.026	0.092	3.43892e-24	9.12278e-20
Sned1	-1.75659	0.022	0.052	4.04033e-09	0.000107182
Ctps	-1.75474	0.058	0.111	5.15526e-13	1.36759e-08
Phtf1	-1.75407	0.023	0.051	2.97543e-08	0.000789323
Paxbp1	-1.75401	0.034	0.077	2.28151e-12	6.0524e-08
Eepd1	-1.75292	0.023	0.056	6.05273e-10	1.60567e-05
Odf2	-1.74395	0.021	0.054	1.74629e-10	4.63256e-06
Elmo2	-1.74386	0.048	0.094	1.39942e-11	3.71238e-07
Hdac2	-1.74191	0.081	0.159	2.08412e-20	5.52876e-16
Tmem176b	-1.74171	0.059	0.137	1.05501e-21	2.79874e-17
Incenp	-1.74076	0.03	0.06	8.97059e-08	0.00237972
Srpk1	-1.74049	0.065	0.136	3.02146e-19	8.01532e-15
Tdp2	-1.74032	0.055	0.103	1.11469e-11	2.95705e-07
Hs3st1	-1.73748	0.029	0.073	4.10673e-13	1.08943e-08
Mettl16	-1.73586	0.037	0.07	3.39095e-08	0.000899552
Nr3c2	-1.73579	0.03	0.061	5.86465e-08	0.00155577
Slc20a2	-1.7309	0.033	0.066	1.28804e-08	0.000341691
Parp1	-1.72534	0.048	0.091	3.88068e-10	1.02947e-05
Rnps1	-1.72376	0.081	0.148	1.65766e-16	4.39744e-12
Mybbp1a	-1.72281	0.059	0.109	7.20568e-12	1.91152e-07
Mfsd10	-1.7176	0.034	0.07	2.99429e-09	7.94324e-05
Nt5dc2	-1.71713	0.024	0.056	1.69788e-09	4.50413e-05
Abce1	-1.71709	0.08	0.151	8.26877e-18	2.19354e-13
Snrpa	-1.71149	0.07	0.114	2.84952e-09	7.5592e-05
Knl1	-1.71048	0.025	0.069	4.91144e-14	1.30291e-09
Col15a1	-1.70837	0.051	0.172	1.10977e-42	2.94401e-38
Unk	-1.70417	0.048	0.09	2.41735e-10	6.41275e-06
Zfas1	-1.70372	0.035	0.065	5.5416e-07	0.0147008
Pcdhgb6	-1.70077	0.029	0.062	8.17866e-09	0.000216963
Usp10	-1.70063	0.036	0.071	2.91677e-09	7.7376e-05
Tbc1d16	-1.70049	0.113	0.208	3.88695e-24	1.03113e-19
Nudt13	-1.69996	0.03	0.059	3.09009e-07	0.00819739
Dapk2	-1.69647	0.021	0.066	3.15602e-15	8.37228e-11
Ccdc61	-1.69224	0.032	0.059	9.53844e-07	0.0253036
Trafd1	-1.69108	0.044	0.093	5.97231e-13	1.58433e-08
Mcm3	-1.69093	0.031	0.086	1.93035e-17	5.12083e-13
Tmem214	-1.69085	0.031	0.06	2.2862e-07	0.00606484
Hdgfl3	-1.68758	0.025	0.062	2.32075e-11	6.15647e-07
2610307P16Rik	-1.68746	0.184	0.425	5.07681e-90	1.34678e-85
Pogz	-1.68731	0.058	0.11	9.99645e-13	2.65186e-08
Xpo6	-1.68615	0.065	0.136	6.89756e-19	1.82979e-14
Mrps35	-1.68524	0.031	0.065	8.06345e-09	0.000213907
Ppp2r3d	-1.68478	0.06	0.111	6.18147e-12	1.63982e-07
Srsf1	-1.68455	0.123	0.252	4.22546e-38	1.12093e-33
Kctd3	-1.6834	0.048	0.089	6.35098e-10	1.68479e-05
Hnrnpa1	-1.68312	0.186	0.34	2.21423e-49	5.8739e-45
Pi4kb	-1.68194	0.048	0.091	3.80391e-10	1.0091e-05
Rnmt	-1.68099	0.037	0.073	3.56419e-09	9.45507e-05
4632427E13Rik	-1.68081	0.084	0.189	1.91212e-31	5.07247e-27
Atp8b2	-1.68046	0.047	0.096	8.60336e-13	2.2823e-08
Fbxo21	-1.67902	0.031	0.065	3.72524e-09	9.88232e-05
Agap3	-1.67725	0.078	0.131	9.03647e-12	2.39719e-07
Dnmt3a	-1.67703	0.138	0.289	1.29319e-48	3.43057e-44
Ubp1	-1.67694	0.087	0.173	3.23504e-23	8.58192e-19
Vps50	-1.67653	0.024	0.059	1.56261e-10	4.1453e-06
Ckap5	-1.67595	0.085	0.158	7.13405e-18	1.89252e-13
Map1b	-1.67576	0.053	0.135	5.52951e-25	1.46687e-20
Nae1	-1.67064	0.042	0.087	4.00342e-12	1.06203e-07
Srebf2	-1.66828	0.05	0.097	8.33544e-12	2.21123e-07
Fbxw4	-1.66788	0.026	0.062	1.21829e-10	3.23189e-06
Srsf2	-1.66725	0.138	0.261	3.32467e-35	8.81967e-31
Slc16a6	-1.66708	0.024	0.057	1.99055e-09	5.28054e-05
Trappc12	-1.66645	0.03	0.059	1.53471e-07	0.00407128
Abhd16a	-1.66431	0.034	0.077	2.92191e-12	7.75123e-08
Mdm4	-1.66208	0.114	0.234	7.7663e-36	2.06024e-31
Cdk5rap2	-1.66163	0.063	0.124	1.52473e-15	4.04481e-11
Ncapd3	-1.6615	0.055	0.112	1.28002e-14	3.39564e-10
Nnt.1	-1.66086	0.044	0.075	1.70157e-06	0.0451392
Trim3	-1.65833	0.046	0.089	1.6227e-10	4.30469e-06
Ets2	-1.65802	0.176	0.426	8.14575e-95	2.16091e-90
Rps6ka1	-1.6551	0.065	0.121	3.60194e-13	9.55522e-09
Nin	-1.65186	0.078	0.171	1.2117e-26	3.21441e-22
Ndst1	-1.65017	0.131	0.235	5.21828e-27	1.38431e-22
Smarcc1	-1.64988	0.092	0.172	6.04015e-20	1.60233e-15
Gm26782	-1.6485	0.027	0.054	8.92493e-07	0.023676
Atg16l1	-1.6472	0.03	0.069	6.12614e-11	1.62514e-06
Fat1	-1.64587	0.028	0.065	1.62061e-10	4.29915e-06
Cfap20	-1.64561	0.088	0.146	2.21087e-12	5.86498e-08
Prnd	-1.64467	0.059	0.213	3.61473e-58	9.58915e-54
Sh3pxd2b	-1.6432	0.097	0.193	2.39616e-25	6.35652e-21
Ssbp3	-1.64169	0.06	0.13	1.08868e-19	2.88806e-15
Tpst1	-1.64057	0.087	0.176	1.71398e-23	4.54685e-19
Rab8b	-1.63735	0.122	0.23	9.80743e-28	2.60171e-23
Arfgap1	-1.63158	0.033	0.065	4.02801e-08	0.00106855
Clk4	-1.62993	0.064	0.132	3.68507e-18	9.77574e-14
Pnn	-1.62936	0.093	0.193	1.62115e-28	4.30059e-24
Bahcc1	-1.62864	0.033	0.063	1.50085e-07	0.00398146
Tsnax	-1.62807	0.099	0.167	2.99826e-15	7.95377e-11
Mcu	-1.62448	0.054	0.133	1.52348e-23	4.04148e-19
Zfp445	-1.62111	0.063	0.133	8.12401e-19	2.15514e-14
Gm17066	-1.62009	0.032	0.073	2.25085e-11	5.97106e-07
Akap8l	-1.62007	0.025	0.061	6.92942e-11	1.83824e-06
Ccser1	-1.61827	0.097	0.28	8.60781e-65	2.28348e-60
Rasa3	-1.61601	0.04	0.09	6.87187e-14	1.82297e-09
Sgk1	-1.61561	0.059	0.141	6.01834e-24	1.59654e-19
Timm44	-1.61385	0.086	0.166	9.73395e-21	2.58222e-16
Ptpn4	-1.61319	0.084	0.181	8.69791e-28	2.30738e-23
Stat2	-1.60457	0.048	0.09	3.57338e-10	9.47945e-06
Dvl1	-1.60447	0.039	0.079	2.45827e-10	6.52131e-06
Tomm34	-1.60392	0.047	0.081	1.6624e-07	0.00441
Tnip1	-1.60376	0.05	0.087	2.57421e-08	0.000682886
Dcaf13	-1.60241	0.036	0.069	5.18738e-08	0.00137611
Lrrcc1	-1.60042	0.044	0.092	1.08068e-12	2.86682e-08
Cbx6	-1.59842	0.159	0.28	6.42903e-34	1.70549e-29
Ankrd10	-1.598	0.079	0.148	5.0297e-17	1.33428e-12
Rubcn	-1.59724	0.037	0.078	4.97964e-11	1.321e-06
Eri3	-1.59523	0.037	0.075	9.04572e-10	2.39965e-05
Ccnl2	-1.59369	0.166	0.31	1.59686e-43	4.23616e-39
Gpat4	-1.58832	0.07	0.115	1.76415e-09	4.67993e-05
Zcchc2	-1.58627	0.037	0.065	1.28092e-06	0.0339803
Fhip1b	-1.57543	0.045	0.087	3.95078e-10	1.04806e-05
Csad	-1.57538	0.037	0.076	2.06359e-10	5.4743e-06
Ranbp3	-1.57263	0.046	0.087	1.38899e-09	3.68471e-05
Atxn7l1	-1.57254	0.094	0.164	5.36804e-16	1.42403e-11
Snrnp40	-1.57219	0.065	0.11	1.01568e-09	2.69439e-05
Serpinb6a	-1.57053	0.088	0.155	2.56265e-15	6.79819e-11
Ect2	-1.57048	0.018	0.055	8.30717e-13	2.20373e-08
Sh3bp5	-1.56834	0.189	0.356	5.00717e-51	1.3283e-46
Ywhag	-1.56789	0.084	0.16	1.43109e-19	3.79639e-15
Zfp746	-1.56381	0.057	0.09	1.39441e-06	0.0369909
E130308A19Rik	-1.56301	0.1	0.215	1.04687e-32	2.77714e-28
Itm2c	-1.56285	0.161	0.304	1.09686e-42	2.90975e-38
Hnrnpdl	-1.56147	0.101	0.197	7.64381e-26	2.02775e-21
Rbm26	-1.56141	0.11	0.226	7.04284e-34	1.86832e-29
Trabd2b	-1.56025	0.063	0.13	3.34319e-17	8.86882e-13
Gask1b	-1.55809	0.029	0.093	1.04481e-21	2.77167e-17
Ncoa7	-1.55732	0.048	0.109	5.80699e-17	1.54048e-12
Impact	-1.55475	0.021	0.052	3.16696e-09	8.4013e-05
Taf11	-1.55438	0.056	0.089	8.22353e-07	0.0218154
Btbd3	-1.55414	0.227	0.399	1.66623e-52	4.42018e-48
Txnip	-1.5519	0.196	0.416	4.81538e-77	1.27742e-72
Mtch1	-1.54948	0.113	0.191	1.69661e-17	4.50075e-13
Tmem94	-1.54648	0.06	0.105	6.37767e-10	1.69187e-05
Luc7l3	-1.54601	0.086	0.214	2.06416e-40	5.4758e-36
Qser1	-1.54587	0.1	0.164	5.80764e-14	1.54065e-09
Smarcd1	-1.54584	0.073	0.136	1.93005e-14	5.12004e-10
Dchs1	-1.54237	0.044	0.083	6.58779e-09	0.000174761
Chmp7	-1.53953	0.057	0.093	1.51433e-07	0.00401722
Cibar1	-1.53888	0.033	0.06	1.36389e-06	0.0361814
Proser1	-1.53886	0.051	0.101	3.84017e-12	1.01872e-07
Pnisr	-1.53768	0.105	0.238	1.6876e-39	4.47686e-35
Bub1b	-1.53566	0.019	0.051	7.37977e-10	1.95771e-05
Nrp2	-1.53477	0.181	0.427	3.61341e-92	9.58565e-88
Kit	-1.534	0.131	0.321	3.85671e-64	1.02311e-59
Hmgcr	-1.53365	0.049	0.095	1.28112e-11	3.39855e-07
Fam149b	-1.53355	0.037	0.068	1.45346e-07	0.00385574
Smc5	-1.53248	0.072	0.131	3.9737e-14	1.05414e-09
Plec	-1.53236	0.137	0.244	1.11647e-26	2.96178e-22
Hnrnph3	-1.53211	0.127	0.218	2.6092e-22	6.9217e-18
Casd1	-1.53203	0.116	0.19	3.24613e-16	8.61133e-12
Strn4	-1.52812	0.065	0.11	1.75268e-09	4.64952e-05
Eed	-1.52591	0.08	0.135	1.12105e-11	2.97391e-07
Hmbox1	-1.52502	0.278	0.474	2.60893e-70	6.92096e-66
Aars	-1.52437	0.045	0.082	2.25666e-08	0.000598646
Gkap1	-1.52406	0.061	0.118	4.24444e-14	1.12597e-09
Spg7	-1.51742	0.048	0.079	5.71266e-07	0.0151546
Rfwd3	-1.51738	0.053	0.1	2.22166e-11	5.89362e-07
Nvl	-1.51598	0.037	0.078	5.13471e-11	1.36214e-06
Fubp3	-1.51524	0.055	0.098	5.9211e-10	1.57075e-05
Arhgef25	-1.51325	0.025	0.053	2.02395e-07	0.00536913
Prpf38a	-1.5119	0.04	0.071	4.62725e-07	0.0122752
Acp1	-1.51171	0.032	0.065	7.70761e-09	0.000204467
Cse1l	-1.5098	0.055	0.095	1.15336e-08	0.000305963
Lypla2	-1.50768	0.04	0.07	1.11099e-06	0.0294723
Ndufa10	-1.50635	0.051	0.103	4.68408e-13	1.24259e-08
Gls	-1.50583	0.049	0.102	9.63585e-14	2.5562e-09
Ago2	-1.50309	0.148	0.253	1.93002e-26	5.11995e-22
Chst7	-1.50209	0.021	0.053	1.42641e-09	3.78399e-05
Man1a	-1.50167	0.136	0.304	1.50142e-55	3.98297e-51
Txnrd1	-1.50155	0.089	0.161	1.87876e-16	4.98396e-12
2810403D21Rik	-1.50147	0.047	0.081	2.0336e-07	0.00539473
A930006K02Rik	-1.49994	0.04	0.104	4.87899e-19	1.2943e-14
Tmem161b	-1.49608	0.046	0.091	3.89037e-11	1.03204e-06
Hexa	-1.49367	0.025	0.054	3.43738e-08	0.000911868
Trpc6	-1.4906	0.053	0.118	1.11469e-17	2.95706e-13
2610037D02Rik	-1.48977	0.063	0.126	2.27776e-16	6.04245e-12
Rtca	-1.48873	0.025	0.051	3.97254e-07	0.0105383
Rpe	-1.48784	0.041	0.075	6.84888e-08	0.00181687
Capn7	-1.4851	0.051	0.099	9.40554e-12	2.4951e-07
Ahcyl1	-1.48335	0.114	0.208	5.16026e-24	1.36891e-19
Nup88	-1.4808	0.059	0.105	1.01871e-10	2.70243e-06
Josd1	-1.48072	0.04	0.07	9.06801e-07	0.0240556
Plp2	-1.47741	0.024	0.051	2.75055e-07	0.00729666
Cabin1	-1.47536	0.066	0.126	6.61485e-15	1.75479e-10
Hspa14	-1.47519	0.067	0.107	3.03767e-08	0.000805833
Slc39a11	-1.47174	0.134	0.237	1.25107e-25	3.31885e-21
Ranbp10	-1.4715	0.101	0.168	1.22697e-14	3.2549e-10
Ythdc2	-1.47046	0.029	0.057	2.48044e-07	0.00658012
Med26	-1.46651	0.03	0.057	9.49909e-07	0.0251992
Ppp1r14b	-1.46422	0.057	0.119	8.61175e-16	2.28453e-11
Ccdc58	-1.46392	0.036	0.067	2.27676e-07	0.0060398
Ctnnbl1	-1.46364	0.058	0.097	1.72305e-08	0.000457091
Cpsf6	-1.46281	0.112	0.202	3.27843e-23	8.69701e-19
Ylpm1	-1.46254	0.087	0.165	7.07352e-20	1.87646e-15
H2ac24	-1.46197	0.044	0.101	5.17012e-16	1.37153e-11
Tbk1	-1.4615	0.064	0.111	1.4585e-10	3.8691e-06
Relch	-1.4612	0.07	0.152	1.30086e-22	3.45093e-18
Rbm28	-1.46009	0.047	0.088	6.3014e-10	1.67164e-05
Jade1	-1.45927	0.054	0.093	2.2563e-08	0.00059855
Gimap4	-1.45807	0.023	0.073	5.28072e-17	1.40087e-12
Cbfa2t2	-1.4559	0.052	0.092	4.90047e-09	0.00013
Bmp1	-1.45579	0.032	0.06	4.71689e-07	0.012513
Cops5	-1.45499	0.1	0.163	1.42394e-13	3.77742e-09
Map2k2	-1.45271	0.078	0.119	4.33028e-08	0.00114874
Ewsr1	-1.45271	0.156	0.287	1.28647e-37	3.41275e-33
Cntrl	-1.44935	0.074	0.121	5.40581e-10	1.43405e-05
Pola1	-1.44548	0.066	0.129	1.23913e-15	3.28716e-11
Marchf5	-1.44447	0.073	0.115	2.64252e-08	0.000701007
Tmem164	-1.44366	0.149	0.283	2.64755e-37	7.02341e-33
Rfx7	-1.44306	0.058	0.119	9.50648e-16	2.52188e-11
Tkt	-1.442	0.08	0.136	1.14088e-11	3.02654e-07
Gm49797	-1.44193	0.089	0.169	5.14208e-20	1.36409e-15
Rb1	-1.43963	0.108	0.201	6.18132e-24	1.63978e-19
Akap11	-1.43632	0.118	0.203	1.86136e-20	4.93781e-16
Cavin3	-1.43253	0.075	0.136	5.977e-14	1.58558e-09
Dera	-1.43241	0.041	0.071	1.39675e-06	0.0370529
Hmgcs1	-1.43223	0.078	0.149	1.82617e-17	4.84448e-13
Slc25a17	-1.43114	0.052	0.084	9.42489e-07	0.0250023
Zc3h18	-1.43112	0.106	0.17	2.97028e-13	7.87955e-09
B930095G15Rik	-1.43078	0.019	0.051	7.38353e-10	1.9587e-05
Tnfsf10	-1.43075	0.066	0.2	1.74349e-46	4.62512e-42
Atp8b1	-1.43045	0.04	0.088	4.73448e-13	1.25596e-08
Stxbp6	-1.42982	0.139	0.323	1.93264e-59	5.12691e-55
Plk2	-1.42765	0.183	0.354	2.0846e-50	5.53004e-46
Npnt	-1.42735	0.024	0.054	1.44881e-08	0.000384342
Arhgap21	-1.42711	0.041	0.088	2.42443e-12	6.43153e-08
Dhx36	-1.42675	0.094	0.163	2.69141e-16	7.13977e-12
Aifm1	-1.42574	0.067	0.113	8.37489e-10	2.22169e-05
Trmt1l	-1.42243	0.048	0.092	7.38603e-11	1.95936e-06
Lcp2	-1.42114	0.066	0.158	2.97628e-26	7.89548e-22
Antxr1	-1.42022	0.025	0.053	6.89641e-08	0.00182948
Abca4	-1.41924	0.029	0.07	3.39961e-12	9.01849e-08
Fat4	-1.419	0.136	0.259	4.93326e-32	1.3087e-27
Usp19	-1.41896	0.07	0.113	8.9346e-09	0.000237017
Maged1	-1.41848	0.084	0.169	2.28765e-22	6.06867e-18
Ndufaf4	-1.41704	0.057	0.107	9.72945e-12	2.58103e-07
Fastk	-1.41645	0.037	0.07	2.75125e-08	0.000729852
Gna12	-1.41532	0.172	0.309	4.75936e-36	1.26256e-31
Traf7	-1.41452	0.103	0.162	8.40324e-12	2.22921e-07
Ppp3cb	-1.41004	0.113	0.204	5.35015e-23	1.41929e-18
Mt2	-1.4097	0.079	0.147	2.58123e-16	6.84748e-12
Gar1	-1.40938	0.06	0.1	2.88192e-08	0.000764514
Rif1	-1.40846	0.135	0.227	1.45375e-21	3.85652e-17
Mov10	-1.40831	0.041	0.072	1.09985e-06	0.0291769
Dhx15	-1.40797	0.17	0.269	9.03915e-23	2.3979e-18
Iqsec1	-1.40557	0.139	0.25	2.51322e-29	6.66706e-25
Cdh13	-1.40504	0.021	0.054	4.43758e-10	1.1772e-05
Arhgef7	-1.40429	0.16	0.266	3.56063e-26	9.44563e-22
Cecr2	-1.40342	0.044	0.091	5.59859e-12	1.48519e-07
Gsr	-1.40318	0.061	0.102	1.70869e-08	0.000453282
Fnip1	-1.40271	0.056	0.121	1.15393e-17	3.06114e-13
Spata5	-1.40165	0.072	0.143	3.0324e-18	8.04436e-14
Lmbr1l	-1.40162	0.034	0.064	2.50721e-07	0.00665114
Ttll4	-1.40138	0.036	0.066	2.12854e-07	0.00564658
Anapc4	-1.39871	0.095	0.153	3.07508e-12	8.15758e-08
Traf3	-1.39767	0.025	0.058	2.52709e-09	6.70388e-05
Pgap2	-1.39618	0.054	0.089	2.65505e-07	0.00704331
Mif	-1.39476	0.077	0.127	3.20748e-10	8.5088e-06
Fam91a1	-1.39436	0.085	0.14	5.33048e-11	1.41407e-06
Uck2	-1.3942	0.037	0.074	3.58146e-09	9.50089e-05
Cenpp	-1.3907	0.036	0.101	2.8291e-20	7.50503e-16
Nrros	-1.38866	0.077	0.203	1.18881e-39	3.15366e-35
Prrc2a	-1.38857	0.153	0.243	5.27593e-20	1.3996e-15
Safb2	-1.38832	0.053	0.095	1.13122e-09	3.0009e-05
Racgap1	-1.38579	0.028	0.07	1.82392e-12	4.83849e-08
Dlst	-1.37837	0.059	0.105	2.79939e-10	7.42622e-06
Mtm1	-1.37703	0.034	0.07	4.61738e-09	0.00012249
Pdhb	-1.37251	0.074	0.111	3.87225e-07	0.0102723
Gle1	-1.36984	0.074	0.118	1.32726e-08	0.000352095
Kcnq1ot1	-1.36831	0.049	0.108	8.48279e-16	2.25031e-11
Ttc3	-1.3646	0.156	0.293	2.60088e-39	6.89963e-35
Lmtk2	-1.36374	0.06	0.111	5.27726e-12	1.39995e-07
Lmnb1	-1.36299	0.076	0.149	4.77463e-18	1.26661e-13
Nek6	-1.36115	0.057	0.097	1.62241e-08	0.000430393
Tacc2	-1.36009	0.026	0.051	1.32975e-06	0.0352755
Kansl2	-1.35979	0.059	0.096	8.20027e-08	0.00217537
Ttyh3	-1.35776	0.144	0.247	2.82183e-24	7.48576e-20
Nup50	-1.35543	0.068	0.106	2.90633e-07	0.00770991
Uhrf1	-1.35199	0.035	0.072	1.28456e-09	3.40769e-05
Dhx30	-1.35124	0.052	0.091	9.58793e-09	0.000254349
Cct3	-1.35102	0.129	0.208	1.57902e-16	4.18882e-12
Ep400	-1.34832	0.156	0.264	3.69579e-27	9.80419e-23
Naa25	-1.34623	0.028	0.058	9.14832e-08	0.00242687
Entr1	-1.34366	0.049	0.085	5.56411e-08	0.00147605
Agpat5	-1.34053	0.049	0.087	1.49415e-08	0.000396367
Wipi2	-1.339	0.08	0.123	3.25579e-08	0.000863696
Sltm	-1.33898	0.11	0.212	8.85983e-27	2.35033e-22
Katnip	-1.337	0.037	0.07	5.12656e-08	0.00135997
Xpo1	-1.33672	0.138	0.22	1.80308e-18	4.78322e-14
Cdk4	-1.33498	0.108	0.181	1.56729e-15	4.15771e-11
Dnmt1	-1.33307	0.086	0.139	1.60674e-10	4.26236e-06
Idh3b	-1.33303	0.047	0.079	4.07595e-07	0.0108127
Adgrl1	-1.33056	0.032	0.06	5.29579e-07	0.0140487
Akap8	-1.32932	0.043	0.077	7.66856e-08	0.00203431
Ddx47	-1.32897	0.064	0.099	1.76583e-06	0.046844
Mfn1	-1.32853	0.038	0.069	2.00161e-07	0.00530986
Rad51b	-1.32824	0.055	0.136	1.89279e-23	5.02119e-19
Smarcb1	-1.32264	0.122	0.175	1.19555e-09	3.17155e-05
Chmp4b	-1.32158	0.102	0.148	2.13906e-08	0.000567449
Enah	-1.32073	0.027	0.064	1.11707e-10	2.96336e-06
Tomm70a	-1.32046	0.118	0.177	2.4992e-11	6.62989e-07
Vps35l	-1.31775	0.059	0.101	3.4236e-09	9.08214e-05
Zdhhc21	-1.31758	0.074	0.123	1.33256e-10	3.53502e-06
Mex3b	-1.31679	0.033	0.063	3.07913e-07	0.00816832
Lrrc32	-1.31623	0.035	0.089	4.4597e-16	1.18307e-11
Cav1	-1.31597	0.368	0.673	1.3431e-143	3.56298e-139
Xpo4	-1.31552	0.086	0.135	1.22138e-09	3.24008e-05
Man1a2	-1.31495	0.114	0.203	1.13057e-21	2.99918e-17
Usp14	-1.31462	0.067	0.124	3.76326e-13	9.98318e-09
4833420G17Rik	-1.31347	0.159	0.243	6.76217e-17	1.79387e-12
Dpp4	-1.31109	0.116	0.28	1.26532e-51	3.35665e-47
Taf1	-1.31091	0.113	0.164	6.09838e-10	1.61778e-05
Rnf4	-1.30989	0.096	0.144	1.07057e-08	0.000284
Mapk9	-1.30947	0.056	0.088	1.72492e-06	0.0457587
Tial1	-1.3064	0.104	0.179	1.71238e-17	4.5426e-13
Fam13a	-1.30526	0.34	0.589	2.19885e-96	5.83311e-92
Tbl1xr1	-1.30057	0.175	0.305	1.64131e-35	4.35407e-31
Pced1b	-1.29803	0.066	0.135	2.02462e-17	5.37092e-13
Rbm3	-1.29456	0.099	0.162	4.27781e-13	1.13482e-08
Rftn2	-1.29341	0.087	0.136	1.81988e-09	4.82779e-05
Galnt15	-1.2927	0.092	0.194	5.28508e-27	1.40202e-22
Stk4	-1.2925	0.093	0.159	1.4919e-14	3.95772e-10
Cc2d2a	-1.29092	0.052	0.091	8.29308e-09	0.000219999
Cmtr1	-1.28988	0.057	0.09	1.27955e-06	0.0339439
Tardbp	-1.28952	0.203	0.328	1.18619e-32	3.14672e-28
Eml4	-1.28732	0.187	0.319	9.04733e-36	2.40008e-31
Vta1	-1.2873	0.072	0.128	1.2707e-12	3.37091e-08
Atad1	-1.28482	0.048	0.084	6.41401e-08	0.00170151
Ankra2	-1.28294	0.122	0.174	5.51958e-09	0.000146423
Gabpb2	-1.28269	0.086	0.127	4.31433e-07	0.0114451
Zdhhc17	-1.2821	0.072	0.122	9.33704e-11	2.47693e-06
Edc4	-1.27966	0.063	0.101	2.44613e-07	0.00648909
Crebzf	-1.27962	0.045	0.083	4.28575e-09	0.000113692
Il6st	-1.27874	0.174	0.299	2.26749e-31	6.0152e-27
Hnrnpd	-1.27844	0.162	0.245	4.18243e-17	1.10951e-12
Armcx2	-1.27761	0.083	0.14	4.98016e-12	1.32114e-07
Usp22	-1.2776	0.057	0.102	2.01388e-10	5.34241e-06
Spata13	-1.27726	0.171	0.325	1.72935e-41	4.58763e-37
Agrp	-1.27569	0.051	0.092	4.60943e-09	0.000122279
Cnksr3	-1.27526	0.076	0.13	2.962e-11	7.8576e-07
Firre	-1.27498	0.067	0.104	1.5281e-07	0.00405375
Cenpe	-1.27396	0.041	0.097	1.20284e-15	3.19089e-11
Ncapg2	-1.27353	0.026	0.059	2.89567e-09	7.68164e-05
Rsrp1	-1.27259	0.184	0.335	5.74631e-42	1.52438e-37
Kif15	-1.27112	0.029	0.079	8.85585e-16	2.34928e-11
Myef2	-1.26902	0.062	0.113	8.18546e-12	2.17144e-07
Zfp521	-1.26833	0.261	0.408	8.02303e-39	2.12835e-34
Srsf4	-1.26653	0.15	0.228	8.36858e-16	2.22002e-11
Sfswap	-1.26631	0.105	0.198	1.01893e-23	2.70302e-19
Stip1	-1.26618	0.082	0.12	1.12134e-06	0.0297469
Bst2	-1.26601	0.071	0.126	4.22614e-12	1.12111e-07
Cstf3	-1.26526	0.105	0.201	8.01882e-25	2.12723e-20
Xpot	-1.26512	0.109	0.167	7.99285e-11	2.12034e-06
Ppp3ca	-1.26285	0.215	0.392	8.00502e-54	2.12357e-49
Cmas	-1.26249	0.06	0.096	3.5157e-07	0.00932645
Ppp1r10	-1.26204	0.137	0.209	1.90912e-14	5.06451e-10
Sgo1	-1.26198	0.029	0.062	1.51537e-08	0.000401997
Cdc20	-1.2611	0.04	0.085	1.56457e-11	4.15048e-07
Pou2f1	-1.25896	0.141	0.25	1.08134e-27	2.86859e-23
Ganab	-1.2576	0.156	0.243	2.54763e-18	6.75836e-14
Ifrd1	-1.25704	0.055	0.091	1.41637e-07	0.00375735
Rnf130	-1.25627	0.049	0.109	2.43394e-16	6.45675e-12
Ak2	-1.25411	0.104	0.152	1.16888e-08	0.000310079
Ncbp1	-1.25333	0.071	0.108	5.07645e-07	0.0134668
Rtcb	-1.25312	0.094	0.135	1.74676e-07	0.00463382
Mki67	-1.25202	0.044	0.122	1.19705e-24	3.17552e-20
Slx4ip	-1.25031	0.063	0.105	1.3639e-08	0.000361816
Ubac2	-1.24917	0.065	0.107	6.49646e-09	0.000172338
Fam102b	-1.24682	0.096	0.191	6.79139e-24	1.80162e-19
Anln	-1.24665	0.032	0.083	1.79519e-15	4.76227e-11
Abcb7	-1.24525	0.161	0.247	2.95531e-17	7.83986e-13
C9orf72	-1.24511	0.105	0.161	8.68544e-11	2.30407e-06
Smarcad1	-1.24408	0.108	0.178	7.56361e-15	2.00647e-10
Got2	-1.24367	0.055	0.089	3.92093e-07	0.0104015
Far1	-1.24095	0.08	0.151	2.684e-17	7.12013e-13
Msl2	-1.24016	0.12	0.162	5.66438e-07	0.0150265
Fyttd1	-1.23982	0.102	0.162	2.55352e-12	6.77399e-08
Cep170	-1.23909	0.115	0.199	5.37856e-20	1.42682e-15
Zfp950	-1.23666	0.083	0.13	1.15574e-09	3.06595e-05
Gtpbp4	-1.23471	0.068	0.105	7.02449e-07	0.0186346
Ppp4r3a	-1.23307	0.148	0.211	5.91903e-12	1.5702e-07
Ivns1abp	-1.22857	0.196	0.318	8.57524e-30	2.27484e-25
Usp31	-1.22592	0.044	0.078	1.90557e-07	0.00505508
Cox16	-1.22388	0.101	0.183	1.50887e-19	4.00273e-15
Foxp2	-1.22348	0.034	0.073	1.34249e-10	3.56136e-06
Zranb1	-1.22271	0.108	0.162	1.81202e-10	4.80692e-06
Ahctf1	-1.22259	0.085	0.137	1.08751e-10	2.88496e-06
Fubp1	-1.21944	0.181	0.306	6.85759e-34	1.81918e-29
Baz1b	-1.21893	0.196	0.274	5.36916e-16	1.42433e-11
Ptpn2	-1.21854	0.047	0.084	2.04929e-08	0.000543635
Deaf1	-1.21664	0.035	0.066	2.16263e-07	0.00573701
Phip	-1.21425	0.175	0.291	9.03496e-30	2.39679e-25
Cpsf7	-1.2112	0.096	0.146	8.92322e-10	2.36715e-05
Iars	-1.20937	0.062	0.096	1.54539e-06	0.0409961
Mbtd1	-1.20828	0.154	0.273	1.35679e-30	3.5993e-26
Smoc2	-1.20747	0.034	0.079	4.44804e-12	1.17997e-07
Rbm17	-1.20699	0.121	0.164	3.33378e-07	0.00884386
Lpcat1	-1.20615	0.081	0.125	3.62183e-08	0.000960799
Ints3	-1.20592	0.078	0.122	2.68959e-08	0.000713494
Armcx4	-1.20375	0.061	0.111	4.63519e-11	1.22962e-06
Memo1	-1.20276	0.075	0.125	1.37831e-10	3.65638e-06
Mcrs1	-1.20238	0.062	0.102	5.46233e-08	0.00144905
Top2a	-1.20222	0.087	0.235	1.19161e-46	3.16111e-42
Wsb1	-1.20133	0.125	0.202	8.5459e-17	2.26706e-12
Rnase4	1.20189	0.059	0.029	2.93409e-08	0.000778355
Vwa1	1.20454	0.579	0.386	1.56359e-72	4.1479e-68
Adcy9	1.20551	0.136	0.09	1.23626e-08	0.000327955
Tcf7l2	1.20887	0.353	0.265	5.56149e-19	1.47535e-14
St3gal5	1.21133	0.076	0.041	2.40895e-08	0.000639047
Rassf9	1.21225	0.545	0.369	1.71086e-57	4.53858e-53
Dcbld1	1.21517	0.213	0.13	5.80656e-17	1.54036e-12
Ptprb	1.21521	0.932	0.806	3.58145e-208	9.50088e-204
Atl2	1.21604	0.208	0.129	3.8422e-17	1.01926e-12
Nkd1	1.21628	0.391	0.243	4.42766e-38	1.17457e-33
Ttr	1.21873	0.387	0.326	1.32897e-12	3.5255e-08
Sfrp2	1.22453	0.063	0.024	6.51642e-13	1.72868e-08
Enc1	1.22518	0.252	0.131	1.27884e-30	3.3925e-26
Mfng	1.22556	0.122	0.07	3.57577e-11	9.48581e-07
Kcnq1	1.22791	0.316	0.201	1.40204e-26	3.71934e-22
Cdk14	1.22803	0.128	0.072	2.18897e-12	5.80689e-08
Htra1	1.22974	0.16	0.07	1.23054e-25	3.26437e-21
Isyna1	1.22979	0.267	0.14	2.76605e-33	7.33778e-29
Ndufaf7	1.24855	0.091	0.049	4.78355e-10	1.26898e-05
Als2cl	1.25744	0.125	0.067	2.35292e-13	6.24183e-09
Klf4	1.26327	0.339	0.193	1.59978e-38	4.24391e-34
Nampt	1.27111	0.597	0.433	3.72276e-62	9.87574e-58
Hdac9	1.28426	0.061	0.02	1.08488e-14	2.87797e-10
Mboat2	1.29279	0.092	0.05	5.85822e-10	1.55407e-05
Klf10	1.30563	0.209	0.132	1.14694e-15	3.0426e-11
Ccm2l	1.30852	0.31	0.179	4.79511e-33	1.27205e-28
Smpdl3a	1.31187	0.16	0.069	1.88982e-26	5.01333e-22
Ankrd37	1.31631	0.206	0.113	2.05051e-22	5.43959e-18
Sat1	1.31799	0.25	0.144	2.5223e-25	6.69116e-21
Notum	1.32015	0.324	0.164	7.25336e-46	1.92417e-41
Anxa3	1.33051	0.604	0.395	2.25111e-78	5.97173e-74
Zfand2a	1.33102	0.07	0.033	3.08691e-10	8.18894e-06
Far2	1.3338	0.355	0.24	3.02152e-26	8.01549e-22
Irf2bpl	1.33401	0.263	0.135	3.88975e-34	1.03187e-29
Smox	1.33832	0.239	0.132	9.44526e-27	2.50564e-22
Srarp	1.33993	0.214	0.109	2.94598e-27	7.81509e-23
Selenom	1.34253	0.101	0.05	3.19672e-13	8.48027e-09
Cdh2	1.3505	0.507	0.37	1.3337e-49	3.53804e-45
Aspscr1	1.3678	0.145	0.073	2.87431e-18	7.62496e-14
Ldlrad3	1.36813	0.556	0.366	3.31612e-63	8.79701e-59
Cd40	1.36978	0.099	0.044	1.51329e-15	4.01446e-11
Rgcc	1.37701	0.202	0.125	3.72162e-16	9.87271e-12
Ctla2a	1.38036	0.522	0.324	3.6738e-71	9.74587e-67
Ceacam1	1.39237	0.111	0.066	1.59545e-09	4.23241e-05
Gm13919	1.39561	0.075	0.028	2.76584e-15	7.33722e-11
Sema3c	1.40006	0.52	0.309	5.19971e-71	1.37938e-66
Ppm1l	1.40196	0.112	0.054	2.74636e-15	7.28555e-11
Zbtb46	1.40366	0.21	0.119	6.94547e-21	1.84249e-16
Acsl3	1.41488	0.111	0.048	2.08051e-18	5.51917e-14
Layn	1.43281	0.117	0.057	2.40489e-15	6.37969e-11
Coro7	1.4379	0.065	0.037	7.74673e-07	0.0205505
Tecrl	1.43812	0.092	0.051	2.34999e-09	6.23406e-05
Rapgef4	1.45025	0.752	0.541	1.17421e-154	3.11495e-150
Synm	1.45218	0.412	0.212	4.32554e-65	1.14748e-60
Trpm6	1.46251	0.105	0.058	1.40711e-10	3.73278e-06
Napepld	1.46872	0.102	0.051	2.17538e-13	5.77085e-09
Tom1l2	1.47087	0.228	0.122	9.06965e-29	2.406e-24
Hes1	1.47388	0.689	0.443	1.81325e-131	4.81018e-127
St6galnac4	1.47589	0.056	0.028	1.29166e-07	0.00342653
Alas2	1.48545	0.104	0.051	1.26887e-13	3.36605e-09
Apod	1.48895	0.156	0.083	5.94795e-18	1.57787e-13
Adgrg1	1.49011	0.07	0.036	1.39025e-08	0.000368805
Mgat4a	1.49066	0.169	0.1	7.04307e-15	1.86839e-10
Pop5	1.49089	0.124	0.059	1.04337e-17	2.76785e-13
Tmtc1	1.49853	0.318	0.179	2.39008e-38	6.3404e-34
Hip1	1.49947	0.744	0.501	3.97439e-141	1.05433e-136
Cfh	1.50222	0.109	0.073	1.54616e-06	0.0410164
Gatm	1.51846	0.54	0.317	8.70337e-84	2.30883e-79
Gfra2	1.52118	0.05	0.022	1.73512e-08	0.000460292
Tmtc2	1.5227	0.706	0.526	3.19898e-110	8.48627e-106
Lama5	1.53083	0.192	0.083	7.56652e-33	2.00725e-28
Bpgm	1.53195	0.123	0.057	6.79151e-18	1.80165e-13
Dennd11	1.53789	0.098	0.052	5.7241e-11	1.51849e-06
Prkcb	1.54509	0.16	0.072	1.30427e-25	3.45997e-21
Pglyrp1	1.54653	0.617	0.371	8.71663e-116	2.31235e-111
Tnfrsf12a	1.5503	0.057	0.027	1.62309e-08	0.000430572
Samd12	1.55447	0.268	0.195	5.61524e-14	1.48961e-09
Trpc4	1.56322	0.108	0.053	9.47111e-15	2.5125e-10
Usp43	1.56334	0.075	0.04	1.21009e-08	0.000321012
Cdkn1a	1.56931	0.34	0.159	1.79124e-59	4.7518e-55
Nckap5l	1.56987	0.122	0.064	2.73093e-14	7.24461e-10
Fas	1.58451	0.101	0.042	7.81106e-18	2.07212e-13
B4galt5	1.58461	0.16	0.103	6.84101e-11	1.81478e-06
Ctsh	1.59477	0.533	0.286	6.75e-99	1.79064e-94
Csrp2	1.59988	0.438	0.217	1.61682e-79	4.28909e-75
Gm12868	1.60082	0.141	0.053	2.15841e-28	5.72584e-24
Slc46a3	1.61298	0.162	0.06	2.78934e-34	7.39957e-30
Dock9	1.61793	0.737	0.496	8.65415e-161	2.29577e-156
Pmaip1	1.63068	0.109	0.032	1.4333e-29	3.80227e-25
Ndnf	1.63923	0.353	0.163	1.37331e-64	3.64312e-60
Rras2	1.64213	0.158	0.093	3.49993e-14	9.28461e-10
Zfp423	1.65145	0.231	0.134	1.04626e-23	2.77551e-19
Bcr	1.65223	0.145	0.079	1.93612e-16	5.13614e-12
Fam107a	1.67355	0.071	0.018	1.95593e-22	5.18869e-18
Samd5	1.67536	0.1	0.055	1.26315e-10	3.35087e-06
Gm26532	1.68177	0.051	0.02	6.427e-10	1.70496e-05
Tfeb	1.69214	0.097	0.049	1.91558e-12	5.08165e-08
Rundc3b	1.71539	0.196	0.129	2.24124e-13	5.94557e-09
Def6	1.72225	0.184	0.081	4.72077e-31	1.25233e-26
Sox9	1.73492	0.063	0.023	1.81063e-13	4.80323e-09
Ldlrad4	1.73518	0.436	0.257	5.20555e-59	1.38093e-54
Smad7	1.74101	0.31	0.15	4.5427e-49	1.20509e-44
Fam214b	1.75661	0.09	0.045	1.37233e-11	3.64051e-07
Slc7a8	1.7743	0.154	0.081	2.38296e-18	6.32151e-14
Tfrc	1.77449	0.798	0.507	2.3509e-233	6.23645e-229
Gpr155	1.7948	0.145	0.064	9.34258e-24	2.4784e-19
Nlrc3	1.80226	0.1	0.036	1.36044e-21	3.60897e-17
Wfdc1	1.80632	0.231	0.079	2.04196e-56	5.4169e-52
Samsn1	1.80731	0.105	0.044	2.16256e-18	5.73684e-14
Ecm1	1.81553	0.178	0.06	7.56804e-43	2.00765e-38
Spock2	1.82045	0.878	0.611	0	0
Slc16a9	1.82906	0.186	0.083	3.42278e-31	9.07995e-27
Abcg1	1.84339	0.272	0.115	2.2893e-53	6.07305e-49
Ano4	1.84402	0.09	0.038	2.0314e-15	5.38889e-11
Mir100hg	1.84534	0.103	0.035	5.37761e-24	1.42657e-19
Asap3	1.8607	0.053	0.022	1.08141e-09	2.86878e-05
Rapgef6	1.8673	0.377	0.221	2.28393e-52	6.05881e-48
Mmp28	1.8704	0.135	0.057	5.11499e-24	1.3569e-19
Ncald	1.8778	0.085	0.029	6.61072e-20	1.75369e-15
Prkd1	1.87962	0.194	0.103	2.24371e-24	5.95211e-20
Dhrs3	1.90239	0.065	0.026	6.7616e-12	1.79372e-07
Arhgef10	1.90256	0.139	0.059	2.58587e-24	6.8598e-20
Slc25a42	1.91286	0.05	0.02	1.14396e-09	3.03471e-05
Cdh11	1.92545	0.21	0.114	1.02195e-25	2.71104e-21
Golm1	1.94186	0.191	0.072	4.70063e-41	1.24698e-36
Ptgds	1.94549	0.073	0.039	4.38715e-08	0.00116382
Proser2	2.02497	0.158	0.05	2.56173e-40	6.79576e-36
B430010I23Rik	2.05644	0.074	0.026	8.3745e-17	2.22159e-12
Fn1	2.05763	0.858	0.51	0	0
Rp1	2.06445	0.07	0.031	7.17248e-12	1.90272e-07
Rffl	2.07371	0.067	0.034	4.03359e-09	0.000107003
Tsc22d3	2.09028	0.337	0.115	1.07969e-91	2.86421e-87
Sgpp2	2.14163	0.179	0.083	1.55124e-27	4.11514e-23
Fgfbp1	2.15354	0.068	0.018	2.30462e-20	6.11371e-16
Kank4	2.15781	0.184	0.061	2.01589e-45	5.34776e-41
Ptgis	2.16597	0.08	0.028	6.68392e-18	1.77311e-13
Adgrl3	2.16924	0.805	0.533	2.30724e-251	6.12064e-247
Focad	2.22607	0.196	0.075	3.70543e-44	9.82977e-40
Plxna4	2.23155	0.126	0.052	2.38008e-23	6.31387e-19
Gpr85	2.23655	0.06	0.02	9.60104e-15	2.54696e-10
Tgfa	2.2396	0.276	0.102	1.99291e-66	5.2868e-62
Stx1a	2.24069	0.178	0.073	9.20558e-35	2.44206e-30
Sdk1	2.42535	0.053	0.014	2.91764e-16	7.73992e-12
Zbtb16	2.49672	0.184	0.086	4.00082e-29	1.06134e-24
Cdkn2b	2.5203	0.139	0.024	1.20827e-56	3.2053e-52
Megf6	2.53255	0.293	0.069	5.59007e-107	1.48293e-102
Sorbs2os	2.59506	0.051	0.018	1.06289e-11	2.81964e-07
Plekhh2	2.60528	0.236	0.073	5.90227e-68	1.56575e-63
Lrp8	2.61046	0.66	0.272	6.09836e-255	1.61777e-250
Gm5127	2.6577	0.086	0.043	2.53026e-11	6.71226e-07
Mgll	2.67257	0.315	0.106	2.68895e-91	7.13323e-87
Pmepa1	2.6789	0.378	0.134	3.65002e-110	9.68278e-106
Dpf3	2.68022	0.112	0.02	1.37764e-44	3.6546e-40
Ppm1h	2.69736	0.448	0.165	5.32936e-140	1.41377e-135
Dennd2c	2.77253	0.109	0.029	1.94018e-33	5.1469e-29
Lmntd1	2.99186	0.361	0.091	3.04477e-136	8.07717e-132
Fbln5	3.03059	0.054	0.017	6.48575e-14	1.72054e-09
Stra6	3.10358	0.093	0.014	4.12555e-40	1.09443e-35
F5	3.11526	0.057	0.01	1.20594e-22	3.19912e-18
Tbc1d4	3.11975	0.579	0.186	4.56804e-242	1.21181e-237
Tbx4	3.16038	0.052	0.005	2.45762e-27	6.51957e-23
Adamtsl2	3.18658	0.169	0.025	2.68983e-76	7.13557e-72
Kank1	3.20759	0.187	0.042	1.37235e-68	3.64058e-64
AU021092	3.23219	0.336	0.058	5.99021e-155	1.58908e-150
Galnt17	3.23554	0.054	0.008	4.84588e-23	1.28552e-18
Slc25a33	3.28547	0.05	0.007	7.34531e-23	1.94856e-18
Baiap2	3.37478	0.181	0.042	7.71135e-66	2.04567e-61
Skil	3.40218	0.28	0.064	1.48475e-108	3.93874e-104
Gm41030	3.40556	0.063	0.006	4.14536e-32	1.09968e-27
Rcan3	3.47559	0.093	0.019	1.10124e-34	2.92137e-30
Mvb12b	3.51537	0.194	0.047	9.40556e-70	2.49511e-65
Slc29a4	3.68825	0.052	0.009	1.94972e-21	5.1722e-17
Htra3	4.29715	0.284	0.021	2.49142e-169	6.60924e-165
Dync1i1	4.33574	0.096	0.009	1.1259e-49	2.98678e-45
Eln	4.39699	0.062	0.016	1.35112e-19	3.58426e-15
Ackr2	4.74183	0.065	0.003	1.47263e-38	3.90658e-34
Retreg1	4.78284	0.129	0.016	2.244e-63	5.95289e-59
Map7	5.17743	0.157	0.01	3.82188e-92	1.01387e-87
Rhbdl2	5.24564	0.077	0.006	3.0065e-42	7.97564e-38
Fndc1	5.29626	0.063	0.005	1.04992e-34	2.78523e-30
Spsb1	5.68421	0.118	0.005	1.6625e-72	4.41027e-68
Slc44a5	5.70954	0.126	0.005	7.66628e-77	2.03371e-72

## Sheet: Glia
gene	avg_log2FC	fraction of WT cells expressing	fraction of mutant cells expressing	p_val	p_val_adj
Celf2	-2.11353	0.122	0.667	1.18457e-68	2.92364e-64
Xist	-9.79418	0.002	0.475	1.76657e-64	4.36008e-60
Nalcn	-4.29827	0.029	0.349	2.03446e-37	5.02124e-33
Robo1	-1.59241	0.291	0.581	8.67714e-29	2.14161e-24
Nr4a2	4.1746	0.124	0.007	9.20419e-28	2.27169e-23
Robo2	-3.12312	0.041	0.302	2.34128e-27	5.77851e-23
Olfr1033	1.8298	0.329	0.108	5.2123e-27	1.28645e-22
Ldlrad4	-1.80633	0.141	0.415	1.72245e-24	4.25118e-20
Slc6a13	-1.59494	0.22	0.487	3.32772e-24	8.21315e-20
Camk1d	-1.89357	0.117	0.38	1.14339e-23	2.82199e-19
Rnf220	-2.28119	0.103	0.35	6.49591e-23	1.60326e-18
Per1	2.43147	0.158	0.027	3.76156e-22	9.28391e-18
Igfbp5	1.25949	0.52	0.289	6.32624e-22	1.56138e-17
Plekhg1	-1.63368	0.203	0.445	6.06748e-21	1.49751e-16
Kcnb2	-3.42786	0.05	0.259	1.44273e-20	3.56081e-16
Zeb1	-1.79146	0.2	0.431	3.20782e-20	7.91722e-16
Slc16a9	1.88996	0.296	0.113	4.50851e-20	1.11275e-15
Tcf4	-1.2282	0.375	0.61	6.69347e-20	1.65202e-15
Pard3b	-1.32436	0.279	0.519	9.4158e-20	2.32391e-15
Slc6a20a	-1.23689	0.31	0.548	1.39055e-19	3.43203e-15
Atrnl1	-1.94121	0.117	0.337	6.78287e-19	1.67408e-14
Slc7a11	-2.1113	0.181	0.399	1.69304e-18	4.1786e-14
Flrt2	-2.32251	0.119	0.332	1.75737e-18	4.33736e-14
Csrp2	1.76692	0.177	0.043	2.10483e-18	5.19494e-14
Ubr4	1.49024	0.234	0.075	2.67453e-18	6.60102e-14
Pygb	1.44702	0.289	0.111	3.59451e-18	8.87161e-14
Abi1	1.33463	0.42	0.214	3.80808e-18	9.39872e-14
Sh3d19	-1.64474	0.184	0.401	7.03358e-18	1.73596e-13
Slc1a3	-1.28836	0.277	0.5	1.13593e-17	2.80358e-13
Coq10b	2.05261	0.172	0.044	1.81585e-17	4.4817e-13
Lama1	-2.10231	0.112	0.32	2.19501e-17	5.41751e-13
Kcnt2	-3.71667	0.019	0.185	4.28952e-17	1.0587e-12
Btg2	1.6721	0.208	0.064	6.05089e-17	1.49342e-12
Frmpd4	-1.41361	0.136	0.354	6.71961e-17	1.65847e-12
Nr4a1	4.6205	0.069	0.003	8.83034e-17	2.17942e-12
Epha7	-3.12514	0.041	0.214	1.40455e-16	3.46658e-12
Prickle1	-1.69477	0.124	0.324	5.01804e-16	1.2385e-11
Arhgap20	-2.19584	0.074	0.258	5.2016e-16	1.28381e-11
Sash1	-1.79606	0.129	0.324	8.22692e-16	2.03049e-11
Phip	-1.46369	0.141	0.346	1.96373e-15	4.84668e-11
Peli2	-1.543	0.098	0.291	2.68353e-15	6.62321e-11
Runx1t1	-2.76038	0.036	0.196	4.39869e-15	1.08564e-10
Col4a6	-2.05288	0.069	0.246	5.05146e-15	1.24675e-10
St6gal1	-1.40251	0.169	0.363	2.20918e-14	5.45248e-10
Dync1i1	-3.58329	0.014	0.154	2.26859e-14	5.59911e-10
Dpyd	-1.45978	0.215	0.404	2.51279e-14	6.20182e-10
Adk	-1.39656	0.186	0.374	6.80591e-14	1.67977e-09
Abca1	-1.57738	0.136	0.319	8.32498e-14	2.05469e-09
Ldb2	-2.61647	0.038	0.187	8.96455e-14	2.21254e-09
Mmp16	-2.29652	0.067	0.227	1.5568e-13	3.84234e-09
P4ha1	1.50228	0.177	0.058	2.09996e-13	5.1829e-09
Col4a5	-1.59067	0.158	0.336	2.14778e-13	5.30093e-09
Pdgfra	-1.65934	0.119	0.292	3.89028e-13	9.6016e-09
Dlc1	-1.41632	0.253	0.431	4.03649e-13	9.96246e-09
Focad	-2.69334	0.036	0.178	4.29709e-13	1.06056e-08
Pds5b	-1.3541	0.15	0.322	3.61606e-12	8.92479e-08
Galnt13	-2.65934	0.05	0.19	3.62365e-12	8.94354e-08
Hs3st1	1.50161	0.205	0.082	4.07422e-12	1.00556e-07
Id2	1.24449	0.184	0.067	5.44834e-12	1.34471e-07
Fign	-1.98905	0.067	0.211	1.06364e-11	2.62518e-07
Adra1a	-3.64816	0.014	0.128	1.45371e-11	3.5879e-07
Kcnk2	-1.42694	0.15	0.315	1.52501e-11	3.76389e-07
Tmem132c	-3.1094	0.019	0.136	1.78551e-11	4.40683e-07
Gas7	-1.79384	0.072	0.215	2.26542e-11	5.59128e-07
Dcdc2a	-1.7779	0.093	0.242	3.16488e-11	7.81124e-07
Plekhh2	-1.34151	0.136	0.295	4.40263e-11	1.08661e-06
Plxdc2	-1.27289	0.186	0.35	5.53308e-11	1.36562e-06
Sidt1	-2.01436	0.1	0.244	5.9628e-11	1.47168e-06
Asap1	-1.35988	0.107	0.259	7.93981e-11	1.95962e-06
Hmgcs2	-2.09854	0.055	0.184	9.46112e-11	2.3351e-06
Epha3	-2.46335	0.029	0.145	1.04989e-10	2.59123e-06
Prickle2	-2.63971	0.024	0.138	1.04996e-10	2.59141e-06
Kcnj2	1.43193	0.158	0.057	1.20967e-10	2.98559e-06
Gm20400	2.26061	0.081	0.016	1.2873e-10	3.1772e-06
Foxo1	-1.52409	0.088	0.231	1.52663e-10	3.76788e-06
Mob3b	-1.23664	0.217	0.378	1.57883e-10	3.89671e-06
Sobp	-1.54386	0.098	0.24	1.58443e-10	3.91053e-06
Ccn1	2.91268	0.067	0.011	1.70581e-10	4.21012e-06
Prex2	-2.22923	0.048	0.171	2.17187e-10	5.36039e-06
Gm30382	-4.49428	0.005	0.099	2.25549e-10	5.56677e-06
Ubash3b	1.27594	0.224	0.103	2.34184e-10	5.77991e-06
Agpat4	-1.44537	0.079	0.216	2.43029e-10	5.99819e-06
A230057D06Rik	-1.55422	0.119	0.271	2.46353e-10	6.08023e-06
Dym	-1.80603	0.045	0.17	2.59646e-10	6.40832e-06
Col13a1	-2.11139	0.06	0.186	2.77601e-10	6.85148e-06
Rapgef4	-1.45398	0.15	0.299	3.1523e-10	7.78018e-06
Zkscan2	-1.29349	0.126	0.277	3.24298e-10	8.004e-06
Acss3	-1.71838	0.05	0.174	3.44458e-10	8.50156e-06
Atxn1	-1.33929	0.126	0.278	3.45942e-10	8.53819e-06
Erc2	-2.36954	0.057	0.181	3.76e-10	9.28007e-06
Pdgfrb	-1.97535	0.072	0.2	3.80667e-10	9.39524e-06
Cep112	-2.05192	0.048	0.169	3.91431e-10	9.66091e-06
Plxnc1	-2.77181	0.021	0.127	4.26201e-10	1.05191e-05
Il34	-1.90557	0.069	0.198	4.49503e-10	1.10942e-05
Galnt11	1.73856	0.107	0.031	6.98422e-10	1.72378e-05
Arhgap24	-1.63867	0.112	0.25	6.99627e-10	1.72675e-05
Snx19	1.90767	0.093	0.024	7.14496e-10	1.76345e-05
B130024G19Rik	-1.92936	0.053	0.174	7.38484e-10	1.82265e-05
Ppm1e	-1.48035	0.067	0.196	7.75747e-10	1.91462e-05
1700094D03Rik	3.79804	0.041	0.002	7.78544e-10	1.92152e-05
Pam	-2.10333	0.045	0.163	7.91005e-10	1.95228e-05
Agmo	-2.22599	0.041	0.155	8.86577e-10	2.18816e-05
Arnt2	-1.72827	0.079	0.208	9.21563e-10	2.27451e-05
Adamts10	-1.20086	0.165	0.312	9.76819e-10	2.41089e-05
Klf2	1.24755	0.158	0.06	9.84864e-10	2.43074e-05
Klf4	1.26187	0.181	0.077	1.16674e-09	2.87963e-05
4930578G10Rik	-3.42389	0.014	0.11	1.30549e-09	3.22209e-05
Col18a1	-2.27189	0.024	0.126	2.11848e-09	5.22862e-05
Gm20342	-2.41336	0.021	0.121	2.38794e-09	5.89368e-05
Prr16	-2.64816	0.024	0.124	2.56998e-09	6.34296e-05
Enpp1	-1.80637	0.057	0.176	2.78914e-09	6.88387e-05
Pspc1	-1.61981	0.062	0.182	3.02243e-09	7.45965e-05
Akap7	-1.70085	0.048	0.162	3.08564e-09	7.61567e-05
Sh3rf1	-1.59408	0.084	0.209	3.75962e-09	9.27913e-05
Atp11a	1.2496	0.174	0.074	3.97361e-09	9.80726e-05
Rhbdd2	3.39811	0.041	0.003	4.26608e-09	0.000105291
Fnip1	-1.49988	0.084	0.206	7.55234e-09	0.000186399
Nt5c3	1.49201	0.143	0.056	7.80538e-09	0.000192645
Slc22a23	-1.37682	0.136	0.269	8.9609e-09	0.000221164
Kcnt1	-3.22248	0.012	0.098	9.24684e-09	0.000228221
Elf2	-1.57642	0.057	0.171	9.55622e-09	0.000235857
Col4a1	-1.61714	0.079	0.199	9.855e-09	0.000243231
Rnpc3	-2.30074	0.031	0.13	1.00634e-08	0.000248375
Fos	4.55011	0.033	0.002	1.03385e-08	0.000255164
Sik1	1.48598	0.134	0.051	1.1158e-08	0.000275391
Septin11	-1.26897	0.119	0.249	1.12229e-08	0.000276991
Gnb4	-3.40408	0.01	0.092	1.28749e-08	0.000317766
Ksr1	-2.72999	0.012	0.097	1.30554e-08	0.000322221
Sun1	2.81315	0.05	0.007	1.55676e-08	0.000384224
Nrp1	-1.59578	0.119	0.243	1.77095e-08	0.000437088
Slco3a1	-1.95087	0.057	0.165	1.78476e-08	0.000440496
Slc22a6	-1.67228	0.06	0.17	1.82817e-08	0.000451211
Fbxw5	3.13508	0.043	0.005	1.99267e-08	0.000491812
Tfdp2	-1.5129	0.084	0.201	2.00282e-08	0.000494317
Prkn	-1.35678	0.107	0.231	2.64932e-08	0.000653878
Gm17167	-4.82493	0.002	0.075	2.73433e-08	0.000674861
Fgd6	-1.33369	0.091	0.21	2.7482e-08	0.000678284
Aox3	-1.7673	0.053	0.157	3.03459e-08	0.000748968
Thbs1	1.22413	0.122	0.045	3.5397e-08	0.000873634
Dusp1	2.13508	0.069	0.016	3.73796e-08	0.000922565
Aldh1a1	-1.28033	0.11	0.233	3.87387e-08	0.000956111
Gm30624	-2.76757	0.038	0.133	4.10841e-08	0.001014
Golga2	1.52037	0.107	0.037	4.19618e-08	0.00103566
Txnip	-1.40966	0.1	0.219	4.31434e-08	0.00106482
Swt1	-1.81246	0.048	0.148	4.70904e-08	0.00116224
Gm42439	-1.91749	0.031	0.124	4.91155e-08	0.00121222
Ric1	-1.90932	0.038	0.134	5.38642e-08	0.00132942
Ywhaq	1.30569	0.122	0.046	5.40688e-08	0.00133447
Aebp2	1.33861	0.122	0.046	5.56926e-08	0.00137455
Galnt17	-2.73117	0.014	0.095	6.07378e-08	0.00149907
Shroom2	-1.38509	0.074	0.185	6.12517e-08	0.00151175
Abcb1b	3.79804	0.033	0.002	6.1827e-08	0.00152595
Cdk5	3.457	0.033	0.002	6.25587e-08	0.00154401
Mgat4c	-1.50107	0.036	0.131	6.53303e-08	0.00161242
Sorcs2	-4.28278	0.002	0.071	7.34496e-08	0.00181281
Hmgcs1	1.41261	0.093	0.029	7.72014e-08	0.00190541
Bcas2	2.99069	0.041	0.005	7.77146e-08	0.00191807
Gria3	-2.33441	0.017	0.098	8.8101e-08	0.00217442
Samd5	-3.37589	0.01	0.084	9.10432e-08	0.00224704
Btbd11	-3.21542	0.01	0.083	1.11707e-07	0.00275705
Snw1	1.31982	0.107	0.038	1.16773e-07	0.00288208
Btrc	-1.44989	0.067	0.172	1.17457e-07	0.00289895
AI480526	-1.37589	0.076	0.184	1.18383e-07	0.00292181
Slc66a2	2.23817	0.06	0.013	1.24186e-07	0.00306503
Fmo1	-1.68121	0.05	0.148	1.32044e-07	0.00325897
Dnal1	2.37324	0.05	0.009	1.41375e-07	0.00348927
Srp54a	1.42236	0.115	0.043	1.47508e-07	0.00364065
Tnfrsf19	-1.5909	0.055	0.154	1.54703e-07	0.00381824
2210408I21Rik	-1.32156	0.088	0.199	1.59845e-07	0.00394514
Cyp7b1	-1.95423	0.048	0.142	1.72803e-07	0.00426494
Slc16a12	-1.38849	0.081	0.188	1.97062e-07	0.00486369
Atp6v0e2	3.13508	0.029	0.002	2.07701e-07	0.00512627
Ap1m1	2.70212	0.043	0.007	2.39983e-07	0.00592301
Fntb	-1.68935	0.038	0.128	2.4018e-07	0.00592789
Prpf40b	3.35747	0.031	0.002	2.65534e-07	0.00655365
Rapgef5	-1.20596	0.193	0.315	2.69157e-07	0.00664306
Rpa1	1.55011	0.084	0.026	3.01938e-07	0.00745212
Alg12	2.63758	0.038	0.005	3.09394e-07	0.00763617
Kit	-1.43078	0.079	0.182	3.13258e-07	0.00773152
Mylip	-1.98238	0.031	0.115	3.14802e-07	0.00776964
E130102H24Rik	-3.8422	0.002	0.064	3.50626e-07	0.0086538
Cyria	-2.14105	0.026	0.107	3.54375e-07	0.00874633
Rasgef1b	-3.07438	0.012	0.082	3.68751e-07	0.00910115
Bms1	1.33193	0.103	0.037	3.8878e-07	0.00959547
Dok6	-2.73529	0.019	0.095	3.97419e-07	0.00980869
Galk2	-2.6649	0.014	0.086	4.00794e-07	0.009892
Itga8	-2.79781	0.017	0.09	4.20365e-07	0.010375
Hhip	2.33861	0.062	0.015	4.21783e-07	0.01041
Wipi1	-1.9589	0.029	0.11	4.33686e-07	0.0107038
Acot9	1.7252	0.076	0.023	4.6084e-07	0.011374
Sugp1	-2.65934	0.012	0.081	4.78532e-07	0.0118106
Fat4	-1.27855	0.103	0.21	4.92894e-07	0.0121651
Tfap2b	-2.54942	0.012	0.081	5.02807e-07	0.0124098
Ndrg3	1.20801	0.131	0.056	5.43454e-07	0.013413
Slc25a25	1.75365	0.079	0.024	5.56651e-07	0.0137387
Tmod2	-1.45987	0.115	0.219	5.66604e-07	0.0139844
Atxn7l1	-1.44266	0.045	0.135	5.76157e-07	0.0142201
Lypd6	-2.23648	0.021	0.097	5.79603e-07	0.0143052
Gm53028	2.483	0.045	0.008	5.80612e-07	0.0143301
Col4a2	-2.02278	0.057	0.148	6.0005e-07	0.0148098
Eif2s3y	-1.43695	0.055	0.148	6.04122e-07	0.0149103
Gatm	-2.20066	0.029	0.108	6.61706e-07	0.0163316
Per2	1.41887	0.095	0.034	7.05285e-07	0.0174071
Irf2bpl	1.21308	0.117	0.047	7.08995e-07	0.0174987
Cecr2	-2.40924	0.019	0.092	7.11588e-07	0.0175627
Lrrk2	-1.57422	0.05	0.139	7.41944e-07	0.0183119
Usp13	-3.98905	0.002	0.061	7.56459e-07	0.0186702
Slc25a42	-2.98905	0.007	0.07	8.73002e-07	0.0215466
Entpd3	3.55011	0.026	0.002	8.91631e-07	0.0220063
Hibadh	-1.56323	0.053	0.142	9.05887e-07	0.0223582
Ppp5c	2.20219	0.05	0.011	9.1492e-07	0.0225811
Cpeb3	-2.17571	0.024	0.099	1.0049e-06	0.0248019
Cemip	-1.68311	0.119	0.222	1.10354e-06	0.0272365
Fancc	-1.67228	0.038	0.121	1.11025e-06	0.027402
Kat2a	3.25055	0.029	0.002	1.11695e-06	0.0275676
Lrrc51	3.25055	0.029	0.002	1.11695e-06	0.0275676
Npas2	-2.77181	0.005	0.064	1.18306e-06	0.0291991
Psme3	3.03554	0.031	0.003	1.22321e-06	0.0301899
Alk	-2.82244	0.012	0.077	1.22598e-06	0.0302583
Dact2	4.72004	0.019	0	1.23471e-06	0.0304739
Prkaa2	-1.85077	0.033	0.112	1.24494e-06	0.0307263
Sfmbt1	-1.32243	0.076	0.173	1.26572e-06	0.0312391
E230016M11Rik	-2.03485	0.026	0.101	1.3195e-06	0.0325665
Prkd3	-2.06727	0.024	0.097	1.43134e-06	0.0353268
Phlda1	-1.94631	0.029	0.104	1.53723e-06	0.0379403
Scara5	-3.52314	0.005	0.063	1.61286e-06	0.0398069
Bche	1.40201	0.084	0.029	1.65253e-06	0.040786
Vcam1	-1.93639	0.048	0.131	1.67995e-06	0.0414628
Abca8a	-2.81621	0.017	0.084	1.69978e-06	0.0419523
Snx29	-1.35937	0.076	0.17	1.78619e-06	0.0440851
Timmdc1	-1.37589	0.055	0.143	1.81281e-06	0.044742
Slc38a9	-1.42187	0.053	0.139	1.91445e-06	0.0472506
Pdss2	-1.2628	0.069	0.162	2.00681e-06	0.04953

## Sheet: Astrocytes
gene	avg_log2FC	fraction of WT cells expressing	fraction of mutant cells expressing	p_val	p_val_adj
Xist	-12.1071	0	0.694	7e-153	1.7e-148
Lsamp	-1.44578	0.994	0.999	1.2e-118	2.9e-114
Rora	-1.38113	0.947	0.994	8.4e-105	2.1e-100
Plcb1	-2.07181	0.587	0.889	7.67e-93	1.89e-88
Tnik	-1.49606	0.835	0.95	6.12e-87	1.51e-82
Mdga2	-1.62465	0.809	0.955	6.6e-87	1.63e-82
Kcnma1	-3.21236	0.113	0.597	2.71e-84	6.69e-80
Galnt18	-6.21786	0.006	0.452	2.26e-83	5.59e-79
Mast4	-2.42235	0.146	0.651	6.56e-83	1.62e-78
Magi2	-1.66584	0.536	0.852	8.1e-75	2e-70
Gphn	-1.62684	0.435	0.85	1.32e-71	3.27e-67
Mical2	-2.83176	0.116	0.542	7.21e-70	1.78e-65
Gabrb1	-1.2723	0.828	0.938	5.27e-65	1.3e-60
Pcdh9	-1.291	0.775	0.954	3.12e-63	7.7e-59
Zfhx3	-3.5388	0.053	0.42	4.33e-59	1.07e-54
Gm17167	-6.74901	0.003	0.333	2.95e-58	7.29e-54
Kcnq3	-3.50602	0.056	0.416	7.62e-57	1.88e-52
Sgcd	-3.44326	0.051	0.39	2.45e-52	6.04e-48
Ssbp2	-1.73656	0.247	0.617	1.43e-49	3.53e-45
Celf2	-1.72849	0.2	0.594	5.87e-48	1.45e-43
Kalrn	-4.86355	0.008	0.287	1.59e-46	3.91e-42
4930578G10Rik	-4.72999	0.016	0.292	4.28e-45	1.06e-40
Wdr17	-5.06183	0.008	0.275	1.87e-44	4.6e-40
Ccdc85a	-3.20059	0.036	0.325	8.81e-44	2.17e-39
Smarca2	-2.51808	0.076	0.365	9.01e-40	2.22e-35
Camk1d	-2.91077	0.056	0.328	2.58e-38	6.38e-34
Lama2	-1.30132	0.534	0.749	4.15e-38	1.03e-33
Arhgef28	-3.54464	0.037	0.293	6.19e-38	1.53e-33
Arhgap26	-2.33795	0.098	0.387	9.15e-38	2.26e-33
Thrb	-1.43776	0.402	0.656	1.98e-37	4.88e-33
Grid1	-1.51401	0.276	0.583	5.73e-37	1.41e-32
Plcb4	-1.49923	0.267	0.577	1.01e-36	2.5e-32
Nell2	-4.70305	0.014	0.239	1.94e-35	4.79e-31
Pde8b	-2.90529	0.061	0.317	3.7e-35	9.14e-31
Rmst	-1.90773	0.307	0.575	1.04e-34	2.57e-30
9330159F19Rik	-2.68266	0.065	0.321	1.5e-34	3.7e-30
Gria2	-1.54307	0.452	0.702	3.16e-34	7.8e-30
Nt5c2	-2.45133	0.067	0.32	1.31e-33	3.24e-29
Prkn	-1.54398	0.207	0.503	5.35e-33	1.32e-28
Hip1	-1.84871	0.189	0.463	9.29e-33	2.29e-28
Aldh1a1	-1.63137	0.239	0.518	1.75e-32	4.33e-28
Tmcc3	-1.81492	0.202	0.475	1.84e-32	4.55e-28
Zfp608	-1.29959	0.331	0.61	2.31e-32	5.71e-28
Il1rapl1	-1.71877	0.146	0.433	2.75e-32	6.78e-28
Fat3	-1.49427	0.256	0.544	3.57e-32	8.8e-28
Psd3	-1.38799	0.297	0.583	1.45e-31	3.58e-27
Camk2n1	-3.58519	0.026	0.241	1.51e-31	3.72e-27
Slc24a3	-1.5144	0.231	0.521	1.74e-31	4.29e-27
Wnk2	-2.09165	0.134	0.389	1.05e-30	2.59e-26
Srgap1	-1.89025	0.194	0.454	1.37e-30	3.37e-26
Cdc37l1	-1.54122	0.166	0.436	4.01e-30	9.89e-26
Ndrg2	-1.40904	0.289	0.546	7.52e-30	1.86e-25
Osbpl9	-1.92755	0.132	0.387	7.54e-30	1.86e-25
Bcas3	-1.59126	0.177	0.45	1.49e-29	3.67e-25
Tnrc6b	-1.32821	0.284	0.559	2.55e-29	6.29e-25
Nos1ap	-2.95383	0.043	0.257	6.41e-29	1.58e-24
Dnajc1	-1.83752	0.12	0.369	6.45e-29	1.59e-24
Shisa9	-2.25869	0.101	0.34	6.98e-29	1.72e-24
Adamts20	-4.1738	0.014	0.203	7.54e-29	1.86e-24
Cdk19	-2.05163	0.098	0.338	1.03e-28	2.54e-24
Kcnt1	-4.17925	0.014	0.201	1.76e-28	4.34e-24
Stxbp6	-3.51362	0.022	0.214	3.78e-28	9.34e-24
Cadm1	-1.44744	0.425	0.669	5.65e-28	1.39e-23
Cpeb4	-1.64029	0.213	0.46	7.98e-28	1.97e-23
Ptprm	-1.45133	0.203	0.473	1.47e-27	3.62e-23
Pcdh17	-1.78118	0.135	0.379	2.09e-27	5.17e-23
Cpeb3	-2.74901	0.043	0.248	2.34e-27	5.78e-23
Actr3b	-3.50444	0.019	0.204	2.75e-27	6.78e-23
Gpc6	-1.36341	0.665	0.807	3.4e-27	8.39e-23
Tenm3	-1.81617	0.149	0.393	1.07e-26	2.64e-22
5031439G07Rik	-5.57373	0.003	0.162	9.9e-26	2.44e-21
Fermt2	-2.60887	0.051	0.246	6.13e-25	1.51e-20
Lin52	-1.98003	0.087	0.3	6.46e-25	1.59e-20
Nf1	-1.20271	0.272	0.527	1.02e-24	2.51e-20
Hnrnpa2b1	-1.38487	0.224	0.469	1.11e-24	2.74e-20
Ptprj	-1.40572	0.239	0.481	1.38e-24	3.42e-20
Npas2	-1.54219	0.252	0.477	1.75e-24	4.32e-20
Nxn	-1.61564	0.171	0.403	1.8e-24	4.44e-20
Arhgap31	-2.57622	0.05	0.242	2.54e-24	6.27e-20
Lnpep	-1.8629	0.092	0.305	3.27e-24	8.06e-20
Dab1	-2.46654	0.037	0.221	4.24e-24	1.05e-19
Nalf1	-2.39274	0.123	0.339	4.59e-24	1.13e-19
Plcl1	-1.62319	0.168	0.402	9.1e-24	2.25e-19
Efr3b	-2.30378	0.071	0.27	1.15e-23	2.84e-19
Fkbp5	-2.86135	0.033	0.208	1.17e-23	2.88e-19
Wasf3	-1.30328	0.267	0.502	1.45e-23	3.58e-19
Ralgps2	-2.72613	0.04	0.22	2.04e-23	5.05e-19
Leng8	-2.62126	0.034	0.21	2.15e-23	5.31e-19
Hivep3	-1.27024	0.247	0.486	4.36e-23	1.08e-18
Notch1	-2.27267	0.064	0.254	5.93e-23	1.46e-18
Ptch1	-1.2663	0.363	0.575	7.77e-23	1.92e-18
Ntsr2	-1.59656	0.199	0.414	9.36e-23	2.31e-18
Pfkp	-3.59235	0.014	0.168	1.39e-22	3.42e-18
Arntl	-1.96651	0.075	0.27	2.44e-22	6.01e-18
Irf2	-2.34806	0.053	0.235	2.47e-22	6.09e-18
Macrod2	-1.23202	0.217	0.454	1.17e-21	2.89e-17
Rgs7bp	-2.75932	0.062	0.241	1.9e-21	4.69e-17
Spon1	-1.40284	0.269	0.478	2.61e-21	6.43e-17
Ank	-1.39494	0.165	0.383	2.69e-21	6.64e-17
Erbin	-1.98739	0.084	0.272	4.75e-21	1.17e-16
Pitpnm2	-2.41712	0.042	0.209	5.26e-21	1.3e-16
Asap2	-1.55744	0.13	0.334	6.49e-21	1.6e-16
Ptpn4	-1.28816	0.234	0.45	6.55e-21	1.62e-16
Myo1e	-2.09999	0.061	0.239	7.71e-21	1.9e-16
Cntn1	-1.67373	0.157	0.363	8.51e-21	2.1e-16
Trappc9	-1.41847	0.137	0.347	8.75e-21	2.16e-16
Hif3a	-1.83297	0.099	0.289	1.88e-20	4.64e-16
Cyrib	-2.31236	0.057	0.228	3.02e-20	7.47e-16
Usp54	-2.0821	0.095	0.278	3.15e-20	7.78e-16
Cap2	-2.17276	0.048	0.213	3.48e-20	8.59e-16
Pfkm	-3.15177	0.02	0.165	3.73e-20	9.2e-16
Svil	-1.96645	0.087	0.271	3.9e-20	9.62e-16
Ccnd3	-4.44229	0.006	0.136	4.22e-20	1.04e-15
Cnot4	-1.78943	0.096	0.282	7.18e-20	1.77e-15
Pdgfd	-1.54177	0.217	0.42	8.17e-20	2.02e-15
Asic2	-2.36842	0.026	0.175	8.5e-20	2.1e-15
Daam1	-1.50149	0.14	0.34	8.76e-20	2.16e-15
Dner	-2.18135	0.065	0.235	1.89e-19	4.65e-15
Wwc1	-1.36999	0.289	0.479	2.89e-19	7.12e-15
Cyfip1	-2.63456	0.03	0.176	3.97e-19	9.8e-15
Rtl4	-2.93676	0.03	0.175	4.84e-19	1.2e-14
Zbtb16	-1.37264	0.194	0.391	4.96e-19	1.22e-14
Pias1	-1.44786	0.13	0.324	5.36e-19	1.32e-14
Kcnip1	-3.84365	0.008	0.133	6.2e-19	1.53e-14
Wwtr1	-1.68134	0.096	0.279	6.47e-19	1.6e-14
Mkln1	-1.27499	0.216	0.421	6.67e-19	1.65e-14
Cables1	-1.31583	0.231	0.432	7.51e-19	1.85e-14
Etv6	-1.4586	0.112	0.301	7.7e-19	1.9e-14
Apba2	-1.39107	0.208	0.409	9.67e-19	2.39e-14
Slc9a9	-1.21439	0.148	0.348	1.92e-18	4.75e-14
Lgi1	-1.78368	0.158	0.342	2.62e-18	6.47e-14
Acap2	-1.38339	0.154	0.35	2.83e-18	6.98e-14
Luc7l3	-1.88934	0.09	0.261	5.06e-18	1.25e-13
Cnnm2	-1.79887	0.096	0.268	7.75e-18	1.91e-13
Cdkal1	-1.23906	0.188	0.384	8.93e-18	2.2e-13
Fbxl17	-1.44307	0.191	0.384	1.13e-17	2.8e-13
Gpd2	-1.4258	0.144	0.329	1.57e-17	3.87e-13
Eif4g3	-1.31657	0.193	0.389	2.09e-17	5.15e-13
Astn2	-1.31813	0.233	0.436	2.17e-17	5.36e-13
Atp2b2	-1.62516	0.087	0.256	2.47e-17	6.1e-13
Slc20a1	-2.28504	0.037	0.178	2.56e-17	6.32e-13
Chst11	-1.5874	0.116	0.291	2.65e-17	6.54e-13
S1pr1	-1.79598	0.093	0.258	4.46e-17	1.1e-12
Rfx3	-1.26283	0.165	0.355	5.4e-17	1.33e-12
Tpd52l1	-3.40035	0.012	0.13	6.47e-17	1.6e-12
9430041J12Rik	-1.28828	0.169	0.355	7.31e-17	1.8e-12
Cyria	-2.51546	0.031	0.162	1.36e-16	3.37e-12
Chchd3	-1.20328	0.231	0.42	1.53e-16	3.78e-12
Zcchc7	-1.86502	0.078	0.235	1.61e-16	3.98e-12
Vps41	-2.52023	0.03	0.159	1.75e-16	4.32e-12
Ambra1	-1.36132	0.146	0.326	1.78e-16	4.4e-12
Meis2	-1.21507	0.298	0.48	1.91e-16	4.71e-12
Itsn2	-2.39425	0.039	0.174	2.19e-16	5.4e-12
Pcdh11x	-2.03184	0.061	0.21	2.2e-16	5.42e-12
Mfn1	-1.39244	0.137	0.311	2.82e-16	6.97e-12
Arhgap32	-2.17078	0.03	0.159	3.27e-16	8.08e-12
Ripor2	-2.97907	0.02	0.14	3.29e-16	8.13e-12
Sox2ot	-1.31096	0.12	0.3	3.39e-16	8.36e-12
Gpatch8	-1.26713	0.149	0.329	4.5e-16	1.11e-11
Trib2	-1.64904	0.112	0.276	5.12e-16	1.26e-11
Spred1	-1.22704	0.216	0.395	5.23e-16	1.29e-11
Atf7	-1.33758	0.168	0.344	5.43e-16	1.34e-11
Pnpla7	-1.5905	0.109	0.273	5.97e-16	1.47e-11
Hivep1	-1.9334	0.065	0.212	6.39e-16	1.58e-11
Fam222b	-1.96918	0.061	0.205	8.54e-16	2.11e-11
Desi2	-1.41817	0.152	0.323	1e-15	2.48e-11
Agfg2	-2.9308	0.019	0.134	1.24e-15	3.05e-11
Klhl29	-2.83466	0.026	0.146	2.05e-15	5.05e-11
Adhfe1	-1.94166	0.062	0.204	2.23e-15	5.5e-11
Itih5	-2.09074	0.04	0.171	2.77e-15	6.83e-11
Acss2	-2.46764	0.026	0.145	3.48e-15	8.59e-11
Grin2b	-1.97623	0.107	0.262	3.72e-15	9.19e-11
3110039M20Rik	-5.28422	0.002	0.094	4.06e-15	1e-10
Slc24a4	-6.21952	0	0.09	4.83e-15	1.19e-10
Mfge8	-4.1928	0.003	0.098	5.34e-15	1.32e-10
Nol4	-1.61442	0.11	0.265	6.54e-15	1.61e-10
Jak1	-1.93553	0.061	0.199	6.73e-15	1.66e-10
Galnt1	-1.26363	0.18	0.349	7.08e-15	1.75e-10
Bckdhb	-1.32442	0.126	0.289	8.37e-15	2.07e-10
Gm14093	-2.73674	0.023	0.137	8.39e-15	2.07e-10
Nek7	-1.32715	0.13	0.294	1.05e-14	2.59e-10
Strbp	-1.85103	0.067	0.206	1.27e-14	3.15e-10
Cry2	-1.75744	0.078	0.221	1.31e-14	3.23e-10
Lrrc8c	-4.3217	0.005	0.098	1.76e-14	4.35e-10
Slc10a7	-1.6705	0.095	0.242	1.84e-14	4.53e-10
Lncpint	-3.25008	0.014	0.117	2.19e-14	5.4e-10
Gjb6	-1.34226	0.137	0.296	2.32e-14	5.73e-10
Kctd1	-2.05938	0.04	0.165	2.51e-14	6.19e-10
Eda	-1.74124	0.109	0.257	2.55e-14	6.28e-10
Ocrl	-1.52984	0.106	0.257	3.28e-14	8.09e-10
Rin2	-1.77914	0.059	0.192	3.29e-14	8.12e-10
Acot11	-1.23793	0.151	0.314	3.71e-14	9.16e-10
Phyhd1	-2.06515	0.05	0.176	4.19e-14	1.04e-09
Gramd1b	-1.28873	0.154	0.318	4.45e-14	1.1e-09
Usp6nl	-1.26588	0.193	0.356	4.46e-14	1.1e-09
Magi3	-2.27283	0.036	0.154	4.64e-14	1.15e-09
Thrap3	-2.02899	0.043	0.167	4.68e-14	1.15e-09
Dcaf8	-1.67373	0.084	0.226	4.71e-14	1.16e-09
Supt6	-1.85659	0.053	0.182	5.13e-14	1.27e-09
Ogt	-1.38993	0.127	0.287	5.13e-14	1.27e-09
Ccdc141	-1.73323	0.116	0.265	8.39e-14	2.07e-09
Depdc5	-1.74351	0.071	0.207	8.7e-14	2.15e-09
Whamm	-3.5388	0.008	0.1	1e-13	2.47e-09
Ksr1	-2.73144	0.02	0.124	1.03e-13	2.55e-09
Rsrp1	-1.70641	0.048	0.173	1.09e-13	2.7e-09
Hdac9	-1.63378	0.11	0.259	1.1e-13	2.71e-09
Srrm2	-1.67498	0.09	0.234	1.27e-13	3.14e-09
Fto	-1.54165	0.11	0.258	1.29e-13	3.2e-09
Peak1	-1.78575	0.057	0.186	1.39e-13	3.43e-09
Ppp2r3a	-1.26298	0.109	0.26	1.47e-13	3.62e-09
A830082K12Rik	-2.0363	0.037	0.154	1.48e-13	3.66e-09
Ppil6	-2.39278	0.033	0.144	1.68e-13	4.14e-09
Ralgapa1	-1.49892	0.092	0.234	1.93e-13	4.76e-09
Slc25a12	-1.67571	0.068	0.201	2.16e-13	5.33e-09
Tbl1x	-1.67761	0.07	0.202	2.43e-13	5.99e-09
Cbfb	-2.0836	0.042	0.159	2.48e-13	6.13e-09
Rngtt	-1.69596	0.059	0.187	2.51e-13	6.19e-09
Cntfr	-1.61608	0.092	0.229	3.26e-13	8.04e-09
Prdm5	-1.56063	0.068	0.2	3.33e-13	8.23e-09
Thoc2	-1.42996	0.093	0.236	3.43e-13	8.46e-09
Suclg2	-2.43116	0.025	0.13	3.6e-13	8.89e-09
Ryk	-1.6946	0.068	0.197	4.07e-13	1.01e-08
Ift80	-3.49573	0.008	0.096	4.65e-13	1.15e-08
B930095G15Rik	-1.29854	0.144	0.295	5.02e-13	1.24e-08
Map4	-1.87682	0.053	0.174	5.9e-13	1.46e-08
Nfyc	-1.49141	0.102	0.242	6.44e-13	1.59e-08
Jarid2	-1.3421	0.112	0.259	7.62e-13	1.88e-08
Prickle2	-1.53521	0.071	0.202	7.94e-13	1.96e-08
Arhgap42	-1.46067	0.098	0.237	7.96e-13	1.96e-08
C2cd3	-2.34857	0.03	0.135	8.26e-13	2.04e-08
Kcnd3	-2.37561	0.025	0.127	8.32e-13	2.05e-08
Gna12	-2.69419	0.022	0.121	8.5e-13	2.1e-08
Sybu	-1.23948	0.123	0.27	1.01e-12	2.5e-08
Garem1	-1.30894	0.175	0.325	1.03e-12	2.55e-08
Zfp407	-1.80963	0.061	0.183	1.1e-12	2.72e-08
Sertad2	-1.56262	0.07	0.197	1.24e-12	3.06e-08
Rsf1	-1.32715	0.129	0.275	1.26e-12	3.12e-08
Baz2b	-1.20424	0.183	0.338	1.31e-12	3.22e-08
Kifc3	-2.19857	0.03	0.134	1.39e-12	3.44e-08
Arid1b	-1.29933	0.144	0.293	1.45e-12	3.58e-08
Kdm5b	-1.6496	0.075	0.203	1.57e-12	3.88e-08
Rps6ka5	-1.95657	0.042	0.154	1.73e-12	4.26e-08
Otud7b	-1.41196	0.085	0.219	1.81e-12	4.47e-08
Srek1	-1.31445	0.143	0.29	1.83e-12	4.52e-08
Prr16	-1.86817	0.062	0.184	1.94e-12	4.78e-08
Cbs	-1.39163	0.106	0.243	2.18e-12	5.39e-08
Birc6	-1.89277	0.051	0.167	2.25e-12	5.56e-08
Zfand3	-1.43021	0.102	0.24	2.28e-12	5.62e-08
Dok5	-2.21033	0.037	0.144	2.35e-12	5.79e-08
2210408I21Rik	-1.87974	0.061	0.18	2.62e-12	6.47e-08
Slc15a2	-1.50937	0.092	0.224	2.63e-12	6.49e-08
Mtor	-1.79014	0.048	0.162	2.71e-12	6.69e-08
Klhl5	-1.41962	0.095	0.229	3.01e-12	7.43e-08
Abl2	-1.57084	0.073	0.199	3.3e-12	8.14e-08
Otud7a	-1.84587	0.054	0.172	3.33e-12	8.21e-08
Ncor2	-2.1883	0.028	0.128	3.41e-12	8.42e-08
Cdh23	-2.35822	0.031	0.132	4.96e-12	1.22e-07
Rab11fip2	-1.97071	0.043	0.152	6.16e-12	1.52e-07
Unc79	-3.59818	0.009	0.091	6.18e-12	1.52e-07
Cmip	-2.10239	0.039	0.144	6.65e-12	1.64e-07
Whrn	-3.46256	0.009	0.091	6.68e-12	1.65e-07
Adcy9	-1.63066	0.067	0.187	6.99e-12	1.73e-07
St3gal3	-1.69749	0.059	0.175	7.56e-12	1.87e-07
Aco2	-1.68932	0.064	0.182	7.6e-12	1.88e-07
Snx13	-1.9509	0.036	0.139	8.16e-12	2.01e-07
Flrt1	-4.73674	0.002	0.073	8.8e-12	2.17e-07
Cacng8	-3.27334	0.009	0.09	9.83e-12	2.43e-07
Sema4d	-1.60615	0.09	0.215	1.01e-11	2.49e-07
Zfp462	-1.3828	0.126	0.262	1.05e-11	2.6e-07
Myrip	-4.1883	0.003	0.076	1.06e-11	2.61e-07
Septin7	-1.45133	0.11	0.242	1.19e-11	2.94e-07
Azin1	-1.77326	0.068	0.186	1.28e-11	3.17e-07
Myo18a	-1.236	0.171	0.311	1.3e-11	3.2e-07
Arfip1	-2.01693	0.034	0.135	1.33e-11	3.28e-07
Syn2	-1.44338	0.096	0.225	1.46e-11	3.6e-07
Zfp36l1	-3.11809	0.011	0.092	1.52e-11	3.74e-07
Med12	-2.55825	0.019	0.107	1.52e-11	3.74e-07
St6gal1	-1.86857	0.054	0.166	1.53e-11	3.78e-07
Foxn2	-1.80803	0.057	0.17	1.57e-11	3.87e-07
Ate1	-1.63833	0.067	0.184	1.69e-11	4.17e-07
Rhbdl3	-3.69926	0.006	0.082	1.9e-11	4.68e-07
Ppp1r12b	-1.90254	0.042	0.146	2.06e-11	5.09e-07
Nr3c1	-1.60334	0.068	0.185	2.24e-11	5.52e-07
ENSMUSG00000095041	-3.07812	0.017	0.103	2.25e-11	5.55e-07
Enox1	-1.96035	0.034	0.134	2.3e-11	5.67e-07
Dstyk	-2.40242	0.019	0.106	2.37e-11	5.86e-07
Etnppl	-4.21952	0.005	0.077	2.47e-11	6.09e-07
Tmod2	-1.34723	0.102	0.231	2.6e-11	6.42e-07
Asph	-1.33065	0.099	0.228	2.69e-11	6.65e-07
Rabgap1	-1.81746	0.059	0.17	2.89e-11	7.12e-07
Wdpcp	-1.35378	0.089	0.212	2.94e-11	7.25e-07
Ncoa2	-1.44652	0.085	0.21	2.95e-11	7.29e-07
Ralgds	-1.77326	0.043	0.148	3.14e-11	7.75e-07
Brinp2	-4.38993	0.003	0.073	3.24e-11	7.99e-07
Tenm4	-1.81002	0.02	0.109	3.33e-11	8.21e-07
Tbc1d5	-1.39704	0.099	0.226	3.39e-11	8.36e-07
Gm16168	-2.33716	0.034	0.131	3.46e-11	8.55e-07
Ranbp3l	-1.34776	0.085	0.209	3.71e-11	9.17e-07
Map2k5	-1.56681	0.076	0.193	4.26e-11	1.05e-06
Prpf4b	-1.2209	0.121	0.253	4.36e-11	1.08e-06
Oxct1	-1.96918	0.042	0.143	4.51e-11	1.11e-06
Slc35a3	-2.21687	0.03	0.123	4.56e-11	1.13e-06
Fam219a	-2.73337	0.012	0.092	4.76e-11	1.18e-06
Ppp1r12a	-1.30004	0.14	0.274	4.83e-11	1.19e-06
Htt	-1.51132	0.073	0.189	4.93e-11	1.22e-06
Prkdc	-2.00023	0.037	0.136	5.15e-11	1.27e-06
Nup98	-1.57163	0.062	0.174	5.48e-11	1.35e-06
Nbea	-1.33931	0.144	0.286	5.6e-11	1.38e-06
L3mbtl3	-1.92427	0.04	0.14	5.88e-11	1.45e-06
4632427E13Rik	-1.95057	0.03	0.123	6.05e-11	1.49e-06
Xrn1	-1.73337	0.054	0.161	6.46e-11	1.59e-06
Ldlrad4	-1.61316	0.124	0.251	6.67e-11	1.65e-06
Snph	-4.1143	0.003	0.071	7.01e-11	1.73e-06
Scaf8	-1.63456	0.067	0.178	7.98e-11	1.97e-06
Fam135a	-1.39292	0.081	0.199	8.07e-11	1.99e-06
R3hdm1	-2.59572	0.023	0.11	8.57e-11	2.12e-06
Krit1	-1.98383	0.036	0.132	8.59e-11	2.12e-06
Acer3	-1.4616	0.096	0.217	8.77e-11	2.16e-06
Abi3bp	-3.6112	0.009	0.084	8.88e-11	2.19e-06
Dido1	-1.39744	0.11	0.234	9.41e-11	2.32e-06
Zeb2	-1.30528	0.262	0.406	9.79e-11	2.42e-06
Pcgf5	-2.68655	0.017	0.099	1.01e-10	2.49e-06
Pdgfrb	-2.71668	0.012	0.09	1.03e-10	2.53e-06
Gm35188	-1.34358	0.095	0.217	1.08e-10	2.67e-06
Adra1a	-1.64864	0.085	0.201	1.11e-10	2.74e-06
Strn3	-1.21383	0.11	0.239	1.22e-10	3.02e-06
Stard5	-3.60514	0.006	0.076	1.24e-10	3.07e-06
1110051M20Rik	-1.96378	0.051	0.153	1.35e-10	3.34e-06
Farp2	-1.902	0.045	0.144	1.37e-10	3.39e-06
Rasal2	-1.4724	0.07	0.183	1.42e-10	3.51e-06
Setd3	-2.38624	0.025	0.111	1.44e-10	3.55e-06
Vps13b	-1.46987	0.059	0.167	1.49e-10	3.69e-06
Prodh	-1.41934	0.081	0.196	1.6e-10	3.95e-06
Zmym2	-2.19157	0.028	0.117	1.61e-10	3.98e-06
Ccdc88c	-2.11084	0.033	0.124	1.64e-10	4.05e-06
Adcy8	-1.21151	0.138	0.268	1.72e-10	4.24e-06
Gm1604a	-2.33886	0.016	0.094	1.99e-10	4.92e-06
Chd6	-1.26095	0.109	0.232	2.25e-10	5.56e-06
Fam171b	-1.50043	0.084	0.199	2.28e-10	5.62e-06
Gm9801	-2.70615	0.016	0.093	2.31e-10	5.69e-06
Gm20732	-1.78225	0.047	0.145	2.37e-10	5.84e-06
Mccc2	-2.33398	0.023	0.107	2.54e-10	6.27e-06
Dzip1l	-1.26547	0.127	0.253	2.66e-10	6.56e-06
Heph	-3.3421	0.008	0.077	2.74e-10	6.75e-06
Usp45	-3.16754	0.009	0.081	2.81e-10	6.94e-06
Fam168a	-1.75199	0.051	0.152	2.9e-10	7.16e-06
Fam171a1	-1.95967	0.042	0.137	3.05e-10	7.54e-06
Marchf2	-2.25869	0.023	0.106	3.82e-10	9.44e-06
Pbdc1	-4.40553	0.002	0.063	3.87e-10	9.55e-06
Hes1	-1.83304	0.068	0.174	3.99e-10	9.84e-06
Prxl2a	-1.29568	0.09	0.206	4.16e-10	1.03e-05
Ctnna1	-1.8396	0.042	0.136	4.49e-10	1.11e-05
Nufip2	-1.77326	0.048	0.145	4.58e-10	1.13e-05
Dgki	-1.77326	0.033	0.122	4.8e-10	1.19e-05
Armc8	-1.46728	0.053	0.154	5.02e-10	1.24e-05
Hs2st1	-1.38068	0.092	0.206	5.08e-10	1.25e-05
Gse1	-2.72435	0.017	0.093	5.82e-10	1.44e-05
Nrg1	-2.23793	0.048	0.144	5.84e-10	1.44e-05
Gm12394	-3.07024	0.006	0.072	5.97e-10	1.47e-05
Rab10	-1.20685	0.109	0.23	6.16e-10	1.52e-05
Thsd7a	-2.30144	0.022	0.102	6.37e-10	1.57e-05
Gm4876	-1.2628	0.123	0.244	6.45e-10	1.59e-05
Septin8	-2.07149	0.039	0.13	6.62e-10	1.63e-05
A330023F24Rik	-2.17015	0.03	0.115	6.69e-10	1.65e-05
Tbc1d9b	-1.89979	0.033	0.12	7.83e-10	1.93e-05
Efr3a	-4.66079	0.002	0.061	8.12e-10	2.01e-05
Abhd18	-2.75876	0.012	0.084	8.2e-10	2.02e-05
Ppm1e	-1.99423	0.033	0.119	1.05e-09	2.59e-05
Cdh22	-1.98383	0.056	0.153	1.07e-09	2.63e-05
Tial1	-1.95383	0.028	0.111	1.09e-09	2.68e-05
Soga3	-1.97217	0.025	0.106	1.12e-09	2.76e-05
Rpa1	-1.82389	0.042	0.133	1.23e-09	3.04e-05
Odf2	-2.73337	0.016	0.088	1.28e-09	3.17e-05
Macrod1	-2.46628	0.017	0.091	1.3e-09	3.21e-05
Rnf216	-1.38478	0.087	0.196	1.3e-09	3.22e-05
Parg	-1.50662	0.037	0.126	1.31e-09	3.23e-05
Chd2	-1.29409	0.115	0.232	1.39e-09	3.43e-05
Gm49164	-1.59898	0.076	0.18	1.49e-09	3.67e-05
Gm10125	-1.91646	0.034	0.12	1.52e-09	3.76e-05
Trip12	-1.32422	0.098	0.21	1.53e-09	3.78e-05
Dhx40	-2.74084	0.012	0.082	1.68e-09	4.15e-05
Ccnjl	-1.84893	0.034	0.12	1.72e-09	4.25e-05
Atp9b	-1.66364	0.047	0.139	1.77e-09	4.36e-05
Zfp951	-5.23269	0	0.054	1.98e-09	4.88e-05
Dusp22	-2.1143	0.026	0.106	2.14e-09	5.27e-05
Atp7a	-1.95769	0.03	0.111	2.14e-09	5.27e-05
Ap3m1	-2.02359	0.026	0.106	2.3e-09	5.69e-05
Klhl2	-2.49236	0.014	0.084	2.38e-09	5.87e-05
Swap70	-2.99049	0.011	0.077	2.46e-09	6.07e-05
Med27	-2.23094	0.022	0.098	2.54e-09	6.26e-05
2210408F21Rik	-2.38207	0.023	0.1	2.72e-09	6.72e-05
4933439C10Rik	-5.15177	0	0.053	2.87e-09	7.08e-05
9630028H03Rik	-5.28422	0	0.053	2.87e-09	7.09e-05
Dach1	-1.99698	0.022	0.098	2.94e-09	7.27e-05
Agap1	-1.44002	0.104	0.213	2.97e-09	7.32e-05
N4bp2l2	-1.43188	0.068	0.169	3.21e-09	7.91e-05
Atxn1	-1.37631	0.07	0.171	3.43e-09	8.47e-05
Sdc2	-1.37733	0.082	0.187	3.56e-09	8.78e-05
Nfasc	-1.39114	0.124	0.24	3.57e-09	8.82e-05
Timp3	-1.38207	0.084	0.189	3.76e-09	9.29e-05
Syndig1	-3.07024	0.008	0.07	3.85e-09	9.51e-05
Platr25	-2.79373	0.009	0.073	3.87e-09	9.56e-05
Peli1	-1.61734	0.051	0.143	4.12e-09	0.000102
Cdk14	-1.33398	0.061	0.158	4.45e-09	0.00011
Ctso	-1.65487	0.05	0.14	4.5e-09	0.000111
Ubr1	-2.39729	0.022	0.096	4.64e-09	0.000114
Itih3	-1.69309	0.051	0.142	5.26e-09	0.00013
Gstz1	-2.80889	0.011	0.075	5.27e-09	0.00013
Cdh19	-1.52005	0.113	0.221	5.6e-09	0.000138
Arhgef9	-2.84365	0.014	0.081	5.94e-09	0.000147
Zfp24	-2.09519	0.023	0.098	6.39e-09	0.000158
Mat2a	-1.80385	0.034	0.116	6.48e-09	0.00016
Camkmt	-1.72746	0.042	0.127	6.83e-09	0.000169
B3galt2	-2.09519	0.028	0.105	6.88e-09	0.00017
Mccc1	-2.02359	0.028	0.105	6.91e-09	0.000171
Adam11	-2.77326	0.012	0.077	6.95e-09	0.000172
Pla2g3	-2.7892	0.012	0.077	7e-09	0.000173
Hmgn3	-1.28512	0.126	0.237	7.21e-09	0.000178
Gm42439	-2.20622	0.022	0.094	7.22e-09	0.000178
Vps54	-2.21952	0.023	0.097	8.26e-09	0.000204
Gab1	-1.26425	0.082	0.186	8.69e-09	0.000215
Mier1	-1.24224	0.081	0.182	9.58e-09	0.000237
Dexi	-2.35081	0.019	0.088	9.59e-09	0.000237
Hr	-2.19857	0.03	0.106	9.64e-09	0.000238
Gm26691	-3.73674	0.005	0.061	1e-08	0.000248
Rnf121	-2.21687	0.022	0.093	1e-08	0.000248
Bcl2l1	-1.69926	0.042	0.126	1.02e-08	0.000251
Mob3b	-2.0363	0.033	0.111	1.02e-08	0.000252
Ttll3	-2.80183	0.011	0.073	1.07e-08	0.000263
Ndufs4	-2.1021	0.037	0.118	1.08e-08	0.000265
Sh3rf1	-1.33586	0.085	0.187	1.12e-08	0.000276
Gm28175	-4.49573	0.002	0.053	1.12e-08	0.000277
Col5a3	-4.25869	0.002	0.053	1.12e-08	0.000277
Wbp1l	-1.77326	0.042	0.125	1.25e-08	0.000309
Kpna3	-2.78762	0.014	0.079	1.26e-08	0.00031
Zc3h12b	-1.52934	0.062	0.155	1.26e-08	0.000312
Mib1	-1.20825	0.098	0.203	1.27e-08	0.000313
Crim1	-1.73674	0.033	0.111	1.34e-08	0.000331
Ube2f	-2.57235	0.014	0.079	1.34e-08	0.000331
Focad	-3.58062	0.008	0.066	1.48e-08	0.000366
Emsy	-1.85851	0.033	0.11	1.5e-08	0.000371
Glmn	-2.07024	0.019	0.087	1.53e-08	0.000378
Acad8	-2.73674	0.011	0.072	1.54e-08	0.000381
Wdr7	-1.98739	0.03	0.105	1.55e-08	0.000384
Egfem1	-2.0207	0.028	0.103	1.56e-08	0.000385
Steep1	-2.35822	0.012	0.075	1.61e-08	0.000397
Epn2	-2.00514	0.04	0.122	1.63e-08	0.000402
Dock11	-1.4845	0.051	0.139	1.69e-08	0.000418
Nadk	-1.93133	0.026	0.1	1.78e-08	0.000438
Ttc14	-1.34263	0.071	0.168	1.8e-08	0.000444
Tmem135	-1.24275	0.082	0.182	1.81e-08	0.000446
Csrp1	-1.29636	0.076	0.173	1.82e-08	0.00045
Tsc22d3	-1.49864	0.067	0.159	1.82e-08	0.00045
Ube2b	-2.17796	0.03	0.104	1.84e-08	0.000455
Mapkap1	-1.54964	0.054	0.142	2.06e-08	0.000508
Slc38a9	-1.94319	0.034	0.111	2.07e-08	0.00051
Drp2	-3.51742	0.005	0.058	2.15e-08	0.000529
Dnmt3a	-1.45951	0.048	0.134	2.2e-08	0.000542
Kat6b	-1.20685	0.11	0.215	2.42e-08	0.000598
Frrs1l	-2.40553	0.016	0.08	2.52e-08	0.000621
Zfp644	-2.04827	0.023	0.093	2.56e-08	0.000632
Arhgef37	-3.82057	0.003	0.054	2.81e-08	0.000694
Ppp1r10	-2.1928	0.022	0.09	2.87e-08	0.000708
Pwwp2a	-1.67101	0.05	0.134	2.92e-08	0.000721
Frs2	-1.53587	0.039	0.118	3.24e-08	0.0008
Nrp1	-1.20532	0.064	0.155	3.29e-08	0.000811
5730480H06Rik	-3.0836	0.006	0.061	3.34e-08	0.000824
Ankrd17	-1.42403	0.096	0.195	3.36e-08	0.00083
St8sia1	-2.53106	0.016	0.079	3.37e-08	0.000831
Rsrc1	-1.5922	0.05	0.134	3.4e-08	0.000838
Lgr6	-1.24039	0.079	0.175	3.43e-08	0.000847
Ago2	-1.69926	0.028	0.101	3.44e-08	0.000848
Klhl32	-1.2109	0.073	0.168	3.52e-08	0.00087
Aldh6a1	-1.60976	0.042	0.122	3.55e-08	0.000876
Timp4	-1.41286	0.053	0.138	4.07e-08	0.001005
Cog5	-1.36132	0.084	0.179	4.31e-08	0.001064
Ralgapb	-3.0363	0.009	0.066	4.55e-08	0.001122
Mb21d2	-1.93962	0.026	0.097	4.62e-08	0.001141
Odr4	-3.21687	0.006	0.059	4.79e-08	0.001181
Cnrip1	-3.01612	0.006	0.059	4.99e-08	0.001231
2610044O15Rik8	-4.09519	0.002	0.049	5e-08	0.001235
Umad1	-1.95829	0.02	0.086	5.2e-08	0.001282
Dagla	-3.72435	0.003	0.052	5.87e-08	0.001449
Cmtm3	-3.5388	0.003	0.052	5.93e-08	0.001464
Igsf8	-1.98739	0.022	0.088	5.94e-08	0.001466
Brinp3	-1.37664	0.092	0.189	6.03e-08	0.001488
Pantr1	-1.26265	0.141	0.244	6.26e-08	0.001545
Ahdc1	-1.77326	0.037	0.113	6.61e-08	0.001631
Sfxn2	-1.99049	0.023	0.09	6.74e-08	0.001665
Atrnl1	-1.63669	0.025	0.093	6.76e-08	0.001669
Gprc5b	-1.62126	0.03	0.101	6.86e-08	0.001692
Cldn10	-1.46882	0.061	0.146	6.87e-08	0.001696
Itch	-1.29431	0.104	0.203	6.89e-08	0.0017
Helz	-1.61322	0.054	0.137	7.08e-08	0.001748
Bcor	-2.72435	0.006	0.058	7.37e-08	0.00182
D030047H15Rik	-1.69645	0.04	0.117	7.67e-08	0.001894
Ppp1r9a	-1.41286	0.067	0.155	8.19e-08	0.00202
Prkcd	-1.3258	0.068	0.157	8.25e-08	0.002036
Timm44	-1.94487	0.026	0.094	8.89e-08	0.002195
Usp40	-2.10534	0.023	0.089	9.38e-08	0.002314
Snapc3	-1.25507	0.076	0.167	9.68e-08	0.002389
Vav3	-1.23816	0.127	0.226	9.99e-08	0.002465
Pgap2	-1.64202	0.03	0.1	1.01e-07	0.002491
Idh1	-2.86637	0.008	0.061	1.01e-07	0.002498
Sirpa	-1.37733	0.054	0.137	1.04e-07	0.002557
Tmem241	-1.347	0.059	0.143	1.1e-07	0.002723
Cdc42bpa	-1.22185	0.098	0.194	1.11e-07	0.002729
Cdc73	-1.23983	0.087	0.18	1.12e-07	0.002753
Tlk2	-1.23269	0.089	0.182	1.14e-07	0.002826
Chmp4b	-1.63576	0.028	0.097	1.18e-07	0.00291
Crebrf	-1.64248	0.042	0.118	1.21e-07	0.002992
1110019D14Rik	-1.80618	0.039	0.113	1.27e-07	0.003145
Akt3	-1.28898	0.118	0.217	1.35e-07	0.003325
Gbe1	-1.94883	0.023	0.088	1.35e-07	0.003341
Sgk3	-2.77326	0.009	0.063	1.41e-07	0.003475
Rab11fip4	-2.29568	0.016	0.074	1.43e-07	0.003537
Trmt9b	-1.46841	0.062	0.145	1.46e-07	0.003595
Dlg4	-1.65521	0.039	0.113	1.48e-07	0.003642
Slc25a26	-4.28422	0.002	0.046	1.52e-07	0.00374
Abhd10	-2.57472	0.008	0.059	1.54e-07	0.003806
Plcl2	-2.93962	0.012	0.068	1.63e-07	0.004014
Rab11fip3	-2.24275	0.017	0.076	1.76e-07	0.00434
Adck1	-3.56681	0.003	0.049	1.79e-07	0.004415
Pygm	-1.93133	0.028	0.094	1.87e-07	0.004605
Dcaf6	-1.51742	0.034	0.105	1.88e-07	0.004631
Lpin1	-1.48696	0.042	0.117	1.91e-07	0.004722
Rbbp6	-1.66706	0.042	0.116	1.96e-07	0.004841
Zfp983	-3.23269	0.005	0.052	1.97e-07	0.00487
Chn1	-2.3421	0.016	0.073	2.01e-07	0.004958
Gnb4	-2.4997	0.014	0.07	2.2e-07	0.005432
Tns1	-2.0363	0.022	0.084	2.24e-07	0.005536
Klhl13	-1.66338	0.045	0.12	2.25e-07	0.005544
Ubxn7	-1.53225	0.033	0.102	2.32e-07	0.005719
Pbx3	-1.49573	0.042	0.116	2.45e-07	0.006038
Bmper	-2.1883	0.02	0.081	2.56e-07	0.006314
4930570G19Rik	-3.42096	0.003	0.048	2.61e-07	0.006434
Ramp1	-1.44069	0.048	0.124	2.64e-07	0.006514
Osbpl11	-1.84365	0.028	0.093	2.64e-07	0.006522
Aatk	-1.84726	0.023	0.086	2.66e-07	0.006567
Ttc19	-2.06431	0.025	0.088	2.73e-07	0.006729
Gpbp1l1	-2.36694	0.016	0.072	2.75e-07	0.006794
Cep63	-2.4737	0.011	0.064	2.77e-07	0.006831
Psme4	-1.21429	0.076	0.163	2.81e-07	0.006933
Amotl1	-2.73144	0.009	0.061	2.87e-07	0.007075
Eya4	-1.44272	0.053	0.131	2.96e-07	0.007296
Gm37573	-2.86637	0.008	0.057	2.99e-07	0.007387
Wipi1	-2.69926	0.008	0.057	3.04e-07	0.007513
Cdc42ep4	-2.33886	0.014	0.069	3.22e-07	0.007947
E2f3	-1.29792	0.081	0.168	3.44e-07	0.008499
Hbp1	-1.94883	0.023	0.085	3.57e-07	0.008806
1700019D03Rik	-4.80889	0	0.039	3.63e-07	0.008968
Rbm4	-2.20136	0.012	0.066	3.73e-07	0.009205
Chka	-1.42534	0.056	0.134	3.79e-07	0.009361
Klhl24	-2.25869	0.022	0.082	3.86e-07	0.009521
Gm47644	-1.34318	0.067	0.149	3.9e-07	0.009613
Acad11	-2.77326	0.008	0.056	4.31e-07	0.010634
Acyp2	-1.36311	0.075	0.158	4.34e-07	0.010714
Dhx57	-4.28422	0.002	0.042	4.6e-07	0.011349
Entpd1	-1.69926	0.037	0.106	4.81e-07	0.011873
Ptpn12	-1.98477	0.023	0.084	4.84e-07	0.011937
Eef1akmt2	-1.75799	0.026	0.089	4.9e-07	0.012102
Nxpe4	-1.21463	0.107	0.199	5.15e-07	0.012702
Pibf1	-1.28566	0.078	0.161	5.29e-07	0.013051
Tprkb	-1.30931	0.085	0.172	5.37e-07	0.01325
Gmpr2	-3.3258	0.003	0.046	5.48e-07	0.013532
Mkln1os	-2.5388	0.011	0.062	5.51e-07	0.013607
Usp25	-1.81591	0.023	0.084	5.51e-07	0.013609
Smad3	-1.82389	0.037	0.105	5.53e-07	0.013653
Camta1	-1.88132	0.037	0.105	5.56e-07	0.013716
Vps37a	-1.61427	0.028	0.091	5.92e-07	0.014608
Sfmbt2	-2.77326	0.008	0.055	6.15e-07	0.015167
Zfp592	-1.47442	0.045	0.117	6.17e-07	0.015228
Ppm1h	-1.76759	0.068	0.146	6.27e-07	0.015475
Sec24a	-1.96591	0.019	0.075	6.33e-07	0.015614
Ift57	-1.84365	0.026	0.088	6.37e-07	0.015731
Tef	-1.48376	0.048	0.121	6.42e-07	0.015846
Afap1l2	-1.30732	0.068	0.149	6.56e-07	0.016197
Hlf	-1.33768	0.034	0.101	6.79e-07	0.016765
Irs2	-1.39196	0.037	0.105	6.85e-07	0.016905
Cwc27	-1.66338	0.042	0.111	6.94e-07	0.017135
Cmya5	-1.49149	0.079	0.161	6.99e-07	0.017245
Kif1a	-1.70287	0.022	0.081	7.3e-07	0.018019
Kcnh5	-4.9749	0	0.037	7.63e-07	0.01884
Srr	-1.68655	0.036	0.102	7.72e-07	0.019048
Apex2	-3.64773	0.003	0.045	7.74e-07	0.019102
Dleu2	-1.52005	0.05	0.122	7.83e-07	0.019318
Wnk3	-3.45133	0.003	0.045	7.84e-07	0.019352
Shisa6	-2.94776	0.009	0.057	8.13e-07	0.020074
Nrarp	-2.12593	0.019	0.074	8.18e-07	0.020189
Pcmtd1	-1.38993	0.073	0.153	8.69e-07	0.021441
Mmp14	-2.25869	0.014	0.066	9.14e-07	0.022549
Thada	-1.33452	0.064	0.141	9.19e-07	0.022688
Pomt1	2.60756	0.037	0.004	9.77e-07	0.02411
Eif5	-1.61483	0.033	0.097	9.79e-07	0.024156
Trappc10	-1.39163	0.054	0.128	9.79e-07	0.024165
Gm15952	-2.0562	0.017	0.071	9.96e-07	0.024576
Actl6a	-2.12941	0.012	0.063	1.09e-06	0.026911
Tgfb2	-2.14165	0.012	0.063	1.12e-06	0.027523
Zfand4	-2.4737	0.011	0.059	1.12e-06	0.027622
Gm47121	-3.35822	0.003	0.044	1.14e-06	0.028019
Kif3c	-2.38207	0.011	0.059	1.14e-06	0.028087
Inpp1	-3.29264	0.003	0.044	1.14e-06	0.02812
Fam13a	-1.36694	0.017	0.071	1.15e-06	0.028457
Zfp933	-2.10043	0.016	0.068	1.16e-06	0.028537
Eogt	-3.01205	0.003	0.044	1.17e-06	0.028909
Tcf25	-1.49175	0.059	0.133	1.18e-06	0.029002
Trit1	-2.25869	0.011	0.059	1.18e-06	0.029088
Tmem178b	-1.39789	0.053	0.125	1.18e-06	0.029209
Colgalt2	-2.1883	0.011	0.059	1.19e-06	0.029438
Stx4a	-2.42534	0.009	0.056	1.23e-06	0.030352
Amer2	-1.38814	0.048	0.119	1.25e-06	0.030945
Pcyt1b	-2.62126	0.008	0.053	1.27e-06	0.03131
Spata6l	-2.59429	0.008	0.053	1.27e-06	0.031441
Ptprk	-1.92136	0.037	0.102	1.35e-06	0.033365
Nktr	-1.60429	0.048	0.118	1.4e-06	0.034672
Gtf2f2	-1.93373	0.025	0.083	1.41e-06	0.034725
Scube1	-3.77326	0.002	0.039	1.41e-06	0.034836
Ube4a	-1.65893	0.028	0.088	1.42e-06	0.035011
Nbeal1	-1.63354	0.057	0.13	1.43e-06	0.035232
Cdh4	-1.54409	0.075	0.152	1.53e-06	0.037649
Rars2	-2.08069	0.022	0.077	1.55e-06	0.038256
Ric1	-2.22392	0.016	0.067	1.59e-06	0.039185
Otulin	-1.81123	0.022	0.077	1.64e-06	0.040538
Snx21	-3.3258	0.003	0.042	1.64e-06	0.040553
Xndc1	-1.3258	0.05	0.12	1.66e-06	0.041019
Btrc	-1.3719	0.054	0.126	1.67e-06	0.041154
Gramd4	-1.61427	0.031	0.092	1.68e-06	0.041509
Kif21a	-1.43058	0.039	0.104	1.7e-06	0.042035
5730419F03Rik	-1.35822	0.057	0.131	1.78e-06	0.043876
Tomm40	-2.30931	0.009	0.055	1.8e-06	0.044312
Smim4	-2.25869	0.014	0.064	1.8e-06	0.044431
Asb3	-2.91077	0.006	0.049	1.8e-06	0.04449
Tlr3	-2.74412	0.006	0.049	1.84e-06	0.045425
Zfp973	-1.85343	0.031	0.091	1.93e-06	0.047601
Ncbp3	-2.0562	0.017	0.069	1.93e-06	0.04768
Srbd1	-1.95383	0.02	0.074	1.94e-06	0.047769
