# Supplementary material for: Vascular endothelial-specific loss of TGF-beta signaling as a model for choroidal neovascularization and central nervous system vascular inflammation
Source: eLife. 2025 Dec 23;14:RP107018. doi: 10.7554/eLife.107018 (PMC12726833; doi:10.7554/eLife.107018)
Supplement: Supplementary file 2. [file elife-107018-supp2.xlsx]

## Sheet: Figure 9 SF 1B
Differential expression in Ecs								ECs specific expression
gene	avg_log2FC	Tgfbr1 CKO ECs fraction of cells expressing	Control ECs fraction of cells expressing	p_val	p_val_adj			gene	avg_log2FC	fraction of ECs expressing	fraction of all other cell types expressing	p_val	p_val_adj
Nfkb1	0.573004	0.44	0.34	2.05435e-18	5.44979e-14			Nfkbia	5.32511	0.703	0.027	0	0
Relb	0.942205	0.091	0.04	4.67784e-14	1.24094e-09			Nfkb1	1.52747	0.386	0.15	0	0
Nfkb2	0.624371	0.068	0.041	1.06128e-05	0.281536			Rela	3.89759	0.116	0.008	0	0
Nfkbie	2.76199	0.014	0.004	0.000113935	1			Relb	3.5249	0.064	0.006	7.64896e-214	1.88784e-209
Ikbkb	0.565878	0.176	0.147	0.00109911	1			Nfkb2	3.78606	0.053	0.004	7.2334e-193	1.78528e-188
Nfkbiz	1.00728	0.055	0.039	0.0033717	1			Ikbkb	1.52078	0.154	0.056	2.99066e-139	7.38126e-135
Ikbkg	1.37768	0.053	0.038	0.00533866	1			Ikbkg	1.6645	0.044	0.014	6.82933e-48	1.68555e-43
Rel	0.512338	0.048	0.038	0.0697557	1			Nfkbib	2.57581	0.02	0.003	4.28681e-47	1.05803e-42
Nfkbil1	0.852046	0.025	0.02	0.15693	1			Nfkbiz	1.39184	0.045	0.017	2.49931e-36	6.16856e-32
Nfkbib	0.335169	0.022	0.02	0.611042	1			Nfkbil1	1.61468	0.022	0.007	1.65397e-23	4.08217e-19
Nfkbia	-0.100784	0.71	0.699	0.999979	1			Rel	0.993601	0.042	0.02	1.29145e-20	3.18742e-16
								Ikbke	-1.04055	0.006	0.012	0.000151319	1

## Sheet: Figure 9 SF 1C
gene	avg_log2FC	Tgfbr1 CKO fraction of cells expressing	control fraction of cells expressing	p_val	p_val_adj
Itga1	0.467495	0.939	0.815	5.07935e-65	8.32556e-61
Itga4	0.843187	0.54	0.34	3.19627e-54	5.23901e-50
Itga2	4.37564	0.087	0.004	3.19912e-44	5.24368e-40
Itga6	0.494085	0.531	0.425	1.25104e-19	2.05058e-15
Itgb3bp	2.43147	0.025	0.004	3.87595e-10	6.35307e-06
Itga5	-0.628196	0.095	0.144	2.42977e-08	0.000398264
Itga7	0.792295	0.03	0.017	0.00246188	1
Itga9	-1.17373	0.009	0.018	0.00539004	1
Itga8	-0.812228	0.013	0.023	0.00874155	1
Itga10	1.09361	0.011	0.004	0.0109866	1
Itga2b	-1.06978	0.005	0.011	0.0162824	1
Itgav	-0.279081	0.108	0.124	0.052812	1
Itga3	0.401728	0.029	0.021	0.0571316	1
Itgb5	0.321378	0.067	0.055	0.0744267	1
Itgb1bp1	-0.250349	0.026	0.03	0.316291	1

## Sheet: Figure 9 SF 1D
gene	avg_log2FC	Tgfbr1 CKO fraction of cells expressing	control fraction of cells expressing	p_val	p_val_adj
Itga2	4.46097	0.111	0.008	2.17322e-53	5.76511e-49
Tnfsf10	1.43075	0.2	0.066	1.74349e-46	4.62512e-42
Itga4	0.667668	0.611	0.445	8.30897e-44	2.2042e-39
Itga1	0.312963	0.876	0.787	7.32696e-30	1.94369e-25
Tnfrsf11b	1.13341	0.135	0.05	6.79132e-26	1.8016e-21
Madcam1	2.15867	0.035	0.005	3.5692e-14	9.46836e-10
Itga6	0.225161	0.614	0.531	6.08921e-11	1.61535e-06
Tnfrsf10b	1.2042	0.049	0.021	3.04301e-08	0.000807249
Ccl2	4.09004	0.019	0.003	4.44271e-08	0.00117856
Itgb3bp	1.88643	0.036	0.015	8.05747e-07	0.0213749
Ccl25	0.787583	0.056	0.033	6.28773e-05	1
Tnfaip1	0.101709	0.437	0.389	0.000418369	1
Ccl19	1.16764	0.024	0.014	0.00417632	1
Cx3cl1	0.724646	0.03	0.02	0.0219711	1
